# Supplementary material
Source: publisher figshare collection journal article supplement (https://acs.figshare.com/ndownloader/files/4708153)
Supplement: Supplementary file 1 [file 4708153]

 
data_1-295K
 
_audit_creation_method            SHELXL-97
_chemical_name_systematic
;
 ?
;
_chemical_name_common             ?
_chemical_melting_point           ?
_chemical_formula_moiety          ?
_chemical_formula_sum
 'C54 H56 Co N7 O2 S32'
_chemical_formula_weight          1919.19
 
loop_
 _atom_type_symbol
 _atom_type_description
 _atom_type_scat_dispersion_real
 _atom_type_scat_dispersion_imag
 _atom_type_scat_source
 'C'  'C'   0.0033   0.0016
 'International Tables Vol C Tables 4.2.6.8 and 6.1.1.4'
 'H'  'H'   0.0000   0.0000
 'International Tables Vol C Tables 4.2.6.8 and 6.1.1.4'
 'N'  'N'   0.0061   0.0033
 'International Tables Vol C Tables 4.2.6.8 and 6.1.1.4'
 'O'  'O'   0.0106   0.0060
 'International Tables Vol C Tables 4.2.6.8 and 6.1.1.4'
 'S'  'S'   0.1246   0.1234
 'International Tables Vol C Tables 4.2.6.8 and 6.1.1.4'
 'Co'  'Co'   0.3494   0.9721
 'International Tables Vol C Tables 4.2.6.8 and 6.1.1.4'
 
_symmetry_cell_setting            monoclinic
_symmetry_space_group_name_H-M    P2/n
 
loop_
 _symmetry_equiv_pos_as_xyz
 'x, y, z'
 '-x+1/2, y, -z+1/2'
 '-x, -y, -z'
 'x-1/2, -y, z-1/2'
 
_cell_length_a                    11.2760(2)
_cell_length_b                    8.917(1)
_cell_length_c                    38.176(6)
_cell_angle_alpha                 90.00
_cell_angle_beta                  91.960(1)
_cell_angle_gamma                 90.00
_cell_volume                      3836(3)
_cell_formula_units_Z             2
_cell_measurement_temperature     295
_cell_measurement_reflns_used     ?
_cell_measurement_theta_min       ?
_cell_measurement_theta_max       ?
 
_exptl_crystal_description        ?
_exptl_crystal_colour             Black
_exptl_crystal_size_max           ?
_exptl_crystal_size_mid           ?
_exptl_crystal_size_min           ?
_exptl_crystal_density_meas       ?
_exptl_crystal_density_diffrn     1.662
_exptl_crystal_density_method     'not measured'
_exptl_crystal_F_000              1968
_exptl_absorpt_coefficient_mu     1.141
_exptl_absorpt_correction_type    ?
_exptl_absorpt_correction_T_min   ?
_exptl_absorpt_correction_T_max   ?
_exptl_absorpt_process_details    ?
 
_exptl_special_details
;
 ?
;
 
_diffrn_ambient_temperature       295
_diffrn_radiation_wavelength      0.71069
_diffrn_radiation_type            MoK\a
_diffrn_radiation_source          'fine-focus sealed tube'
_diffrn_radiation_monochromator   graphite
_diffrn_measurement_device_type   ?
_diffrn_measurement_method        ?
_diffrn_detector_area_resol_mean  ?
_diffrn_standards_number          ?
_diffrn_standards_interval_count  ?
_diffrn_standards_interval_time   ?
_diffrn_standards_decay_%         ?
_diffrn_reflns_number             39401
_diffrn_reflns_av_R_equivalents   0.0396
_diffrn_reflns_av_sigmaI/netI     0.0391
_diffrn_reflns_limit_h_min        -14
_diffrn_reflns_limit_h_max        14
_diffrn_reflns_limit_k_min        -11
_diffrn_reflns_limit_k_max        11
_diffrn_reflns_limit_l_min        -50
_diffrn_reflns_limit_l_max        50
_diffrn_reflns_theta_min          1.87
_diffrn_reflns_theta_max          28.01
_reflns_number_total              9158
_reflns_number_gt                 6382
_reflns_threshold_expression      >2sigma(I)
 
_computing_data_collection        'Collect  (Nonius BV, 1997-2000)'
_computing_cell_refinement        'HKL Scalepack (Otwinowski & Minor 1997)'
_computing_data_reduction   'HKL Denzo and Scalepack (Otwinowski & Minor 1997)'
_computing_structure_solution     'SHELXS-97 (Sheldrick, 1997)'
_computing_structure_refinement   'SHELXL-97 (Sheldrick, 1997)'
_computing_molecular_graphics     ?
_computing_publication_material   ?
 
_refine_special_details
;
 Refinement of F^2^ against ALL reflections.  The weighted R-factor wR and
 goodness of fit S are based on F^2^, conventional R-factors R are based
 on F, with F set to zero for negative F^2^. The threshold expression of
 F^2^ > 2sigma(F^2^) is used only for calculating R-factors(gt) etc. and is
 not relevant to the choice of reflections for refinement.  R-factors based
 on F^2^ are statistically about twice as large as those based on F, and R-
 factors based on ALL data will be even larger.
;
 
_refine_ls_structure_factor_coef  Fsqd
_refine_ls_matrix_type            full
_refine_ls_weighting_scheme       calc
_refine_ls_weighting_details
 'calc w=1/[\s^2^(Fo^2^)+(0.1088P)^2^+3.4394P] where P=(Fo^2^+2Fc^2^)/3'
_atom_sites_solution_primary      direct
_atom_sites_solution_secondary    difmap
_atom_sites_solution_hydrogens    geom
_refine_ls_hydrogen_treatment     mixed
_refine_ls_extinction_method      none
_refine_ls_extinction_coef        ?
_refine_ls_number_reflns          9158
_refine_ls_number_parameters      434
_refine_ls_number_restraints      0
_refine_ls_R_factor_all           0.0809
_refine_ls_R_factor_gt            0.0511
_refine_ls_wR_factor_ref          0.1780
_refine_ls_wR_factor_gt           0.1493
_refine_ls_goodness_of_fit_ref    0.980
_refine_ls_restrained_S_all       0.980
_refine_ls_shift/su_max           0.004
_refine_ls_shift/su_mean          0.000
 
loop_
 _atom_site_label
 _atom_site_type_symbol
 _atom_site_fract_x
 _atom_site_fract_y
 _atom_site_fract_z
 _atom_site_U_iso_or_equiv
 _atom_site_adp_type
 _atom_site_occupancy
 _atom_site_symmetry_multiplicity
 _atom_site_calc_flag
 _atom_site_refinement_flags
 _atom_site_disorder_assembly
 _atom_site_disorder_group
C1 C 0.5650(7) 0.4584(7) 1.14420(14) 0.096(2) Uani 1 1 d . . .
H1A H 0.5740 0.5579 1.1542 0.115 Uiso 1 1 calc R . .
H1B H 0.5083 0.4059 1.1583 0.115 Uiso 1 1 calc R . .
C2 C 0.6699(7) 0.3885(10) 1.14963(17) 0.131(4) Uani 1 1 d . . .
H2A H 0.6762 0.3679 1.1746 0.158 Uiso 1 1 calc R . .
H2B H 0.7302 0.4628 1.1450 0.158 Uiso 1 1 calc R . .
C3 C 0.5631(3) 0.3454(4) 1.07754(9) 0.0390(8) Uani 1 1 d . . .
C4 C 0.6470(3) 0.2455(5) 1.08736(10) 0.0425(8) Uani 1 1 d . . .
C5 C 0.6034(3) 0.1918(4) 1.02223(9) 0.0409(8) Uani 1 1 d . . .
C6 C 0.6018(4) 0.1349(4) 0.98887(10) 0.0432(8) Uani 1 1 d . . .
C7 C 0.5632(4) 0.0930(4) 0.92286(9) 0.0423(8) Uani 1 1 d . . .
C8 C 0.6481(4) -0.0066(5) 0.93245(10) 0.0461(9) Uani 1 1 d . . .
C9 C 0.6002(9) 0.0244(8) 0.85463(15) 0.128(3) Uani 1 1 d . . .
H9A H 0.5537 -0.0145 0.8348 0.153 Uiso 1 1 calc R . .
H9B H 0.6520 0.1005 0.8453 0.153 Uiso 1 1 calc R . .
C10 C 0.6705(8) -0.0869(13) 0.86547(15) 0.151(4) Uani 1 1 d . . .
H10A H 0.7420 -0.0745 0.8524 0.181 Uiso 1 1 calc R . .
H10B H 0.6325 -0.1768 0.8562 0.181 Uiso 1 1 calc R . .
C11 C 0.8901(7) 0.7967(8) 1.11535(14) 0.103(2) Uani 1 1 d . . .
H11A H 0.8461 0.8338 1.1350 0.124 Uiso 1 1 calc R . .
H11B H 0.9399 0.7157 1.1243 0.124 Uiso 1 1 calc R . .
C12 C 0.9652(6) 0.9107(12) 1.10563(14) 0.126(3) Uani 1 1 d . . .
H12A H 1.0242 0.9205 1.1246 0.151 Uiso 1 1 calc R . .
H12B H 0.9184 1.0019 1.1057 0.151 Uiso 1 1 calc R . .
C13 C 0.8625(4) 0.7144(5) 1.04681(10) 0.0453(9) Uani 1 1 d . . .
C14 C 0.9618(4) 0.7935(5) 1.04038(10) 0.0513(10) Uani 1 1 d . . .
C15 C 0.9149(4) 0.6453(4) 0.98364(9) 0.0424(8) Uani 1 1 d . . .
C16 C 0.9114(3) 0.5971(4) 0.94949(9) 0.0394(8) Uani 1 1 d . . .
C17 C 0.8425(3) 0.5036(4) 0.88846(9) 0.0405(8) Uani 1 1 d . . .
C18 C 0.9413(4) 0.5847(4) 0.88319(9) 0.0408(8) Uani 1 1 d . . .
C19 C 0.8381(5) 0.4340(7) 0.81888(13) 0.0776(17) Uani 1 1 d . . .
H19A H 0.9005 0.3592 0.8202 0.093 Uiso 1 1 calc R . .
H19B H 0.7875 0.4101 0.7986 0.093 Uiso 1 1 calc R . .
C20 C 0.8926(5) 0.5778(7) 0.81273(12) 0.0765(16) Uani 1 1 d . . .
H20A H 0.8314 0.6542 0.8125 0.092 Uiso 1 1 calc R . .
H20B H 0.9262 0.5765 0.7897 0.092 Uiso 1 1 calc R . .
C21 C 0.1501(6) -0.1317(8) 0.78335(17) 0.096(2) Uani 1 1 d . . .
H21A H 0.0772 -0.1870 0.7842 0.144 Uiso 1 1 calc R . .
H21B H 0.1645 -0.0810 0.8053 0.144 Uiso 1 1 calc R . .
H21C H 0.2143 -0.1995 0.7792 0.144 Uiso 1 1 calc R . .
C22 C 0.1412(4) -0.0188(6) 0.75432(14) 0.0652(13) Uani 1 1 d . . .
H22A H 0.1240 -0.0714 0.7325 0.078 Uiso 1 1 calc R . .
H22B H 0.0746 0.0470 0.7585 0.078 Uiso 1 1 calc R . .
C23 C 0.2263(5) 0.1735(6) 0.71836(12) 0.0639(12) Uani 1 1 d . . .
H23A H 0.1534 0.2285 0.7217 0.077 Uiso 1 1 calc R . .
H23B H 0.2131 0.1089 0.6982 0.077 Uiso 1 1 calc R . .
C24 C 0.3221(6) 0.2843(7) 0.71003(16) 0.0937(19) Uani 1 1 d . . .
H24A H 0.2982 0.3410 0.6896 0.141 Uiso 1 1 calc R . .
H24B H 0.3943 0.2315 0.7057 0.141 Uiso 1 1 calc R . .
H24C H 0.3349 0.3512 0.7295 0.141 Uiso 1 1 calc R . .
C25 C 0.6529(4) -0.1191(4) 0.76968(10) 0.0418(8) Uani 1 1 d . . .
C26 C 0.8482(4) 0.0362(4) 0.79168(10) 0.0451(9) Uani 1 1 d . . .
C27 C 0.8513(3) 0.1817(4) 0.73116(11) 0.0447(9) Uani 1 1 d . . .
N1 N 0.2500 0.0760(5) 0.7500 0.0423(10) Uani 1 2 d S . .
N2 N 0.5956(4) -0.2079(4) 0.78209(10) 0.0612(10) Uani 1 1 d . . .
N3 N 0.9081(4) 0.0414(5) 0.81616(10) 0.0713(12) Uani 1 1 d . . .
N4 N 0.9132(3) 0.2685(5) 0.71991(12) 0.0645(11) Uani 1 1 d . . .
O1 O 0.0522(3) 0.5370(4) 0.72874(11) 0.0771(10) Uani 1 1 d . . .
S1 S 0.49626(11) 0.48254(13) 1.10237(3) 0.0556(3) Uani 1 1 d . . .
S2 S 0.71544(12) 0.22263(15) 1.12867(3) 0.0653(3) Uani 1 1 d . . .
S3 S 0.51168(10) 0.33869(12) 1.03413(2) 0.0479(3) Uani 1 1 d . . .
S4 S 0.69681(10) 0.12283(13) 1.05535(3) 0.0505(3) Uani 1 1 d . . .
S5 S 0.50867(11) 0.20629(12) 0.95608(2) 0.0508(3) Uani 1 1 d . . .
S6 S 0.69583(10) -0.00837(13) 0.97640(3) 0.0520(3) Uani 1 1 d . . .
S7 S 0.49805(12) 0.12152(14) 0.88149(3) 0.0579(3) Uani 1 1 d . . .
S8 S 0.71966(13) -0.13539(15) 0.90624(3) 0.0706(4) Uani 1 1 d . . .
S9 S 0.78348(12) 0.71439(16) 1.08490(3) 0.0648(3) Uani 1 1 d . . .
S10 S 1.04117(17) 0.91429(19) 1.06792(4) 0.0905(5) Uani 1 1 d . . .
S11 S 0.81030(9) 0.59241(14) 1.01389(3) 0.0513(3) Uani 1 1 d . . .
S12 S 1.02570(10) 0.76449(13) 0.99990(3) 0.0525(3) Uani 1 1 d . . .
S13 S 0.80239(9) 0.47916(13) 0.93208(3) 0.0493(3) Uani 1 1 d . . .
S14 S 1.01728(9) 0.65419(12) 0.92033(2) 0.0453(2) Uani 1 1 d . . .
S15 S 0.75182(11) 0.41490(17) 0.85697(3) 0.0657(4) Uani 1 1 d . . .
S16 S 1.00530(13) 0.6289(2) 0.84384(3) 0.0797(5) Uani 1 1 d . . .
Co1 Co 0.7500 0.03245(7) 0.7500 0.03516(17) Uani 1 2 d S . .
 
loop_
 _atom_site_aniso_label
 _atom_site_aniso_U_11
 _atom_site_aniso_U_22
 _atom_site_aniso_U_33
 _atom_site_aniso_U_23
 _atom_site_aniso_U_13
 _atom_site_aniso_U_12
C1 0.155(6) 0.083(4) 0.048(3) -0.016(3) -0.025(3) 0.042(4)
C2 0.120(6) 0.200(8) 0.070(4) -0.070(5) -0.050(4) 0.095(6)
C3 0.041(2) 0.0463(19) 0.0298(17) -0.0058(14) -0.0002(14) -0.0035(16)
C4 0.038(2) 0.052(2) 0.0366(18) -0.0040(16) -0.0052(15) -0.0018(17)
C5 0.041(2) 0.048(2) 0.0339(18) -0.0012(15) 0.0022(15) 0.0035(16)
C6 0.047(2) 0.045(2) 0.0372(19) -0.0014(16) 0.0033(16) 0.0083(17)
C7 0.052(2) 0.046(2) 0.0299(17) -0.0071(15) 0.0046(15) 0.0023(17)
C8 0.052(2) 0.050(2) 0.0368(19) -0.0089(16) 0.0070(17) 0.0046(18)
C9 0.249(10) 0.090(4) 0.048(3) 0.002(3) 0.057(5) 0.072(6)
C10 0.151(7) 0.256(11) 0.045(3) -0.023(5) 0.005(4) 0.127(8)
C11 0.163(7) 0.109(5) 0.038(3) 0.001(3) 0.011(3) -0.032(5)
C12 0.095(5) 0.244(10) 0.039(3) -0.034(4) 0.009(3) -0.054(6)
C13 0.051(2) 0.054(2) 0.0315(18) 0.0029(16) 0.0102(16) 0.0029(18)
C14 0.068(3) 0.056(2) 0.0313(18) -0.0057(17) 0.0106(18) -0.011(2)
C15 0.045(2) 0.051(2) 0.0312(17) -0.0007(15) 0.0026(15) -0.0024(17)
C16 0.037(2) 0.047(2) 0.0341(18) -0.0009(15) -0.0027(15) -0.0023(16)
C17 0.042(2) 0.047(2) 0.0328(18) -0.0063(15) 0.0016(15) -0.0009(16)
C18 0.047(2) 0.0452(19) 0.0304(17) -0.0038(15) 0.0011(15) -0.0046(16)
C19 0.085(4) 0.103(4) 0.046(3) -0.022(3) 0.007(2) -0.038(3)
C20 0.076(4) 0.113(4) 0.040(2) -0.002(3) -0.004(2) -0.020(3)
C21 0.088(4) 0.107(5) 0.093(4) 0.038(4) -0.002(4) -0.022(4)
C22 0.049(3) 0.085(3) 0.062(3) 0.009(2) -0.001(2) -0.010(2)
C23 0.068(3) 0.079(3) 0.045(2) 0.008(2) 0.001(2) 0.005(3)
C24 0.119(5) 0.095(4) 0.068(4) 0.009(3) 0.027(3) -0.026(4)
C25 0.046(2) 0.0401(19) 0.0385(19) -0.0013(15) -0.0052(16) 0.0004(16)
C26 0.046(2) 0.048(2) 0.041(2) -0.0039(17) -0.0028(17) 0.0047(17)
C27 0.036(2) 0.045(2) 0.052(2) 0.0049(17) -0.0080(17) 0.0027(17)
N1 0.030(2) 0.063(3) 0.034(2) 0.000 -0.0009(17) 0.000
N2 0.069(3) 0.055(2) 0.060(2) 0.0087(18) 0.0024(19) -0.0155(19)
N3 0.067(3) 0.101(3) 0.044(2) -0.010(2) -0.0223(19) 0.011(2)
N4 0.049(2) 0.057(2) 0.087(3) 0.018(2) -0.003(2) -0.0086(18)
O1 0.077(2) 0.062(2) 0.091(3) 0.0065(19) -0.012(2) 0.0063(18)
S1 0.0593(7) 0.0629(7) 0.0440(5) -0.0183(5) -0.0059(5) 0.0135(5)
S2 0.0732(8) 0.0746(8) 0.0460(6) -0.0098(5) -0.0253(5) 0.0142(6)
S3 0.0608(7) 0.0516(6) 0.0311(4) -0.0026(4) -0.0039(4) 0.0164(5)
S4 0.0476(6) 0.0624(6) 0.0411(5) -0.0059(4) -0.0043(4) 0.0158(5)
S5 0.0663(7) 0.0562(6) 0.0299(4) -0.0042(4) 0.0005(4) 0.0217(5)
S6 0.0509(6) 0.0632(6) 0.0419(5) -0.0065(5) 0.0029(4) 0.0167(5)
S7 0.0779(8) 0.0629(7) 0.0326(5) -0.0067(4) -0.0007(5) 0.0050(6)
S8 0.0802(9) 0.0707(8) 0.0613(7) -0.0256(6) 0.0088(6) 0.0215(7)
S9 0.0632(8) 0.0887(9) 0.0441(6) 0.0019(6) 0.0229(5) 0.0013(6)
S10 0.1302(14) 0.0938(10) 0.0487(7) -0.0291(7) 0.0238(8) -0.0527(10)
S11 0.0405(6) 0.0730(7) 0.0408(5) -0.0022(5) 0.0058(4) -0.0105(5)
S12 0.0596(7) 0.0665(7) 0.0321(5) -0.0064(4) 0.0105(4) -0.0225(5)
S13 0.0420(6) 0.0678(6) 0.0382(5) -0.0021(4) 0.0028(4) -0.0128(5)
S14 0.0461(6) 0.0581(6) 0.0316(4) -0.0044(4) 0.0006(4) -0.0137(4)
S15 0.0527(7) 0.0973(9) 0.0476(6) -0.0267(6) 0.0085(5) -0.0296(6)
S16 0.0747(9) 0.1319(13) 0.0326(5) -0.0004(6) 0.0018(5) -0.0525(9)
Co1 0.0356(4) 0.0364(3) 0.0329(3) 0.000 -0.0060(3) 0.000
 
_geom_special_details
;
 All esds (except the esd in the dihedral angle between two l.s. planes)
 are estimated using the full covariance matrix.  The cell esds are taken
 into account individually in the estimation of esds in distances, angles
 and torsion angles; correlations between esds in cell parameters are only
 used when they are defined by crystal symmetry.  An approximate (isotropic)
 treatment of cell esds is used for estimating esds involving l.s. planes.
;
 
loop_
 _geom_bond_atom_site_label_1
 _geom_bond_atom_site_label_2
 _geom_bond_distance
 _geom_bond_site_symmetry_2
 _geom_bond_publ_flag
C1 C2 1.347(8) . ?
C1 S1 1.764(5) . ?
C2 S2 1.766(7) . ?
C3 C4 1.343(5) . ?
C3 S1 1.735(4) . ?
C3 S3 1.738(4) . ?
C4 S2 1.744(4) . ?
C4 S4 1.747(4) . ?
C5 C6 1.370(5) . ?
C5 S4 1.731(4) . ?
C5 S3 1.739(4) . ?
C6 S5 1.728(4) . ?
C6 S6 1.737(4) . ?
C7 C8 1.348(6) . ?
C7 S7 1.737(4) . ?
C7 S5 1.749(4) . ?
C8 S6 1.745(4) . ?
C8 S8 1.739(4) . ?
C9 C10 1.327(10) . ?
C9 S7 1.792(6) . ?
C10 S8 1.690(7) . ?
C11 C12 1.382(10) . ?
C11 S9 1.800(7) . ?
C12 S10 1.701(6) . ?
C13 C14 1.353(6) . ?
C13 S9 1.732(4) . ?
C13 S11 1.749(4) . ?
C14 S10 1.732(4) . ?
C14 S12 1.747(4) . ?
C15 C16 1.372(5) . ?
C15 S12 1.739(4) . ?
C15 S11 1.744(4) . ?
C16 S14 1.736(4) . ?
C16 S13 1.733(4) . ?
C17 C18 1.349(5) . ?
C17 S15 1.741(4) . ?
C17 S13 1.754(4) . ?
C18 S14 1.745(4) . ?
C18 S16 1.734(4) . ?
C19 C20 1.444(8) . ?
C19 S15 1.786(5) . ?
C20 S16 1.769(5) . ?
C21 C22 1.498(7) . ?
C22 N1 1.504(5) . ?
C23 N1 1.505(5) . ?
C23 C24 1.506(8) . ?
C25 N2 1.136(5) . ?
C25 Co1 1.909(4) . ?
C26 N3 1.135(5) . ?
C26 Co1 1.908(4) . ?
C27 N4 1.136(5) . ?
C27 Co1 1.910(4) . ?
N1 C23 1.505(5) 2_556 ?
N1 C22 1.504(5) 2_556 ?
Co1 C25 1.909(4) 2_656 ?
Co1 C27 1.910(4) 2_656 ?
Co1 C26 1.908(4) 2_656 ?
 
loop_
 _geom_angle_atom_site_label_1
 _geom_angle_atom_site_label_2
 _geom_angle_atom_site_label_3
 _geom_angle
 _geom_angle_site_symmetry_1
 _geom_angle_site_symmetry_3
 _geom_angle_publ_flag
C2 C1 S1 123.5(5) . . ?
C1 C2 S2 125.8(5) . . ?
C4 C3 S1 129.0(3) . . ?
C4 C3 S3 116.9(3) . . ?
S1 C3 S3 114.1(2) . . ?
C3 C4 S2 128.0(3) . . ?
C3 C4 S4 117.4(3) . . ?
S2 C4 S4 114.6(2) . . ?
C6 C5 S4 122.4(3) . . ?
C6 C5 S3 122.2(3) . . ?
S4 C5 S3 115.4(2) . . ?
C5 C6 S5 121.7(3) . . ?
C5 C6 S6 122.6(3) . . ?
S5 C6 S6 115.7(2) . . ?
C8 C7 S7 128.1(3) . . ?
C8 C7 S5 116.6(3) . . ?
S7 C7 S5 115.3(2) . . ?
C7 C8 S6 117.4(3) . . ?
C7 C8 S8 128.2(3) . . ?
S6 C8 S8 114.4(2) . . ?
C10 C9 S7 124.9(5) . . ?
C9 C10 S8 130.7(5) . . ?
C12 C11 S9 121.9(4) . . ?
C11 C12 S10 124.9(6) . . ?
C14 C13 S9 127.2(3) . . ?
C14 C13 S11 117.0(3) . . ?
S9 C13 S11 115.7(2) . . ?
C13 C14 S10 128.9(3) . . ?
C13 C14 S12 116.9(3) . . ?
S10 C14 S12 114.1(2) . . ?
C16 C15 S12 121.9(3) . . ?
C16 C15 S11 123.1(3) . . ?
S12 C15 S11 115.0(2) . . ?
C15 C16 S14 121.3(3) . . ?
C15 C16 S13 123.5(3) . . ?
S14 C16 S13 115.2(2) . . ?
C18 C17 S15 127.5(3) . . ?
C18 C17 S13 116.7(3) . . ?
S15 C17 S13 115.8(2) . . ?
C17 C18 S14 117.0(3) . . ?
C17 C18 S16 128.4(3) . . ?
S14 C18 S16 114.5(2) . . ?
C20 C19 S15 117.6(4) . . ?
C19 C20 S16 114.8(4) . . ?
N1 C22 C21 115.1(4) . . ?
N1 C23 C24 116.1(4) . . ?
N2 C25 Co1 178.5(4) . . ?
N3 C26 Co1 178.3(4) . . ?
N4 C27 Co1 178.7(4) . . ?
C23 N1 C23 109.4(5) 2_556 . ?
C23 N1 C22 111.1(3) 2_556 . ?
C23 N1 C22 106.8(3) . . ?
C23 N1 C22 106.8(3) 2_556 2_556 ?
C23 N1 C22 111.1(3) . 2_556 ?
C22 N1 C22 111.6(5) . 2_556 ?
C3 S1 C1 102.9(2) . . ?
C4 S2 C2 100.7(2) . . ?
C5 S3 C3 95.33(18) . . ?
C5 S4 C4 94.97(18) . . ?
C6 S5 C7 95.31(18) . . ?
C6 S6 C8 94.93(19) . . ?
C7 S7 C9 100.9(3) . . ?
C10 S8 C8 102.5(3) . . ?
C13 S9 C11 101.0(3) . . ?
C12 S10 C14 103.7(3) . . ?
C15 S11 C13 95.10(19) . . ?
C15 S12 C14 95.36(19) . . ?
C16 S13 C17 94.95(18) . . ?
C16 S14 C18 95.01(18) . . ?
C17 S15 C19 101.3(2) . . ?
C18 S16 C20 102.2(2) . . ?
C25 Co1 C25 89.9(2) . 2_656 ?
C25 Co1 C27 178.22(16) . . ?
C25 Co1 C27 89.22(17) 2_656 . ?
C25 Co1 C27 89.22(17) . 2_656 ?
C25 Co1 C27 178.22(16) 2_656 2_656 ?
C27 Co1 C27 91.7(2) . 2_656 ?
C25 Co1 C26 90.92(16) . 2_656 ?
C25 Co1 C26 90.50(17) 2_656 2_656 ?
C27 Co1 C26 90.65(17) . 2_656 ?
C27 Co1 C26 87.95(17) 2_656 2_656 ?
C25 Co1 C26 90.50(17) . . ?
C25 Co1 C26 90.92(16) 2_656 . ?
C27 Co1 C26 87.95(17) . . ?
C27 Co1 C26 90.65(17) 2_656 . ?
C26 Co1 C26 178.0(2) 2_656 . ?
 
_diffrn_measured_fraction_theta_max    0.988
_diffrn_reflns_theta_full              28.01
_diffrn_measured_fraction_theta_full   0.988
_refine_diff_density_max    0.923
_refine_diff_density_min   -0.661
_refine_diff_density_rms    0.093
 
data_1-200K
 
_audit_creation_method            SHELXL-97
_chemical_name_systematic
;
 ?
;
_chemical_name_common             ?
_chemical_melting_point           ?
_chemical_formula_moiety          ?
_chemical_formula_sum
 'C54 H56 Co N7 O2 S32'
_chemical_formula_weight          1919.91
 
loop_
 _atom_type_symbol
 _atom_type_description
 _atom_type_scat_dispersion_real
 _atom_type_scat_dispersion_imag
 _atom_type_scat_source
 'C'  'C'   0.0033   0.0016
 'International Tables Vol C Tables 4.2.6.8 and 6.1.1.4'
 'H'  'H'   0.0000   0.0000
 'International Tables Vol C Tables 4.2.6.8 and 6.1.1.4'
 'N'  'N'   0.0061   0.0033
 'International Tables Vol C Tables 4.2.6.8 and 6.1.1.4'
 'O'  'O'   0.0106   0.0060
 'International Tables Vol C Tables 4.2.6.8 and 6.1.1.4'
 'S'  'S'   0.1246   0.1234
 'International Tables Vol C Tables 4.2.6.8 and 6.1.1.4'
 'Co'  'Co'   0.3494   0.9721
 'International Tables Vol C Tables 4.2.6.8 and 6.1.1.4'
 
_symmetry_cell_setting            Monoclinic
_symmetry_space_group_name_H-M    P2/n
 
loop_
 _symmetry_equiv_pos_as_xyz
 'x, y, z'
 '-x+1/2, y, -z+1/2'
 '-x, -y, -z'
 'x-1/2, -y, z-1/2'
 
_cell_length_a                    11.2307(3)
_cell_length_b                    8.8363(2)
_cell_length_c                    37.9637(10)
_cell_angle_alpha                 90.00
_cell_angle_beta                  91.9340(10)
_cell_angle_gamma                 90.00
_cell_volume                      3765.29(16)
_cell_formula_units_Z             2
_cell_measurement_temperature     200
_cell_measurement_reflns_used     3653
_cell_measurement_theta_min        0.998
_cell_measurement_theta_max        25.028
 
_exptl_crystal_description        block
_exptl_crystal_colour            black
_exptl_crystal_size_max           ?
_exptl_crystal_size_mid           ?
_exptl_crystal_size_min           ?
_exptl_crystal_density_meas       ?
_exptl_crystal_density_diffrn     1.693
_exptl_crystal_density_method     'not measured'
_exptl_crystal_F_000              1968
_exptl_absorpt_coefficient_mu     1.163
_exptl_absorpt_correction_type    ?
_exptl_absorpt_correction_T_min   ?
_exptl_absorpt_correction_T_max   ?
_exptl_absorpt_process_details    ?
 
_exptl_special_details
;
 ?
;
 
_diffrn_ambient_temperature       200
_diffrn_radiation_wavelength      0.71073
_diffrn_radiation_type            MoK\a
_diffrn_radiation_source          'fine-focus sealed tube'
_diffrn_radiation_monochromator   graphite
_diffrn_measurement_device_type   ?
_diffrn_measurement_method        ?
_diffrn_detector_area_resol_mean  ?
_diffrn_standards_number          ?
_diffrn_standards_interval_count  ?
_diffrn_standards_interval_time   ?
_diffrn_standards_decay_%         ?
_diffrn_reflns_number             7676
_diffrn_reflns_av_R_equivalents   0.0309
_diffrn_reflns_av_sigmaI/netI     0.0618
_diffrn_reflns_limit_h_min        -13
_diffrn_reflns_limit_h_max        13
_diffrn_reflns_limit_k_min        -7
_diffrn_reflns_limit_k_max        10
_diffrn_reflns_limit_l_min        -45
_diffrn_reflns_limit_l_max        45
_diffrn_reflns_theta_min          1.07
_diffrn_reflns_theta_max          25.06
_reflns_number_total              5710
_reflns_number_gt                 4082
_reflns_threshold_expression      >2sigma(I)
 
_computing_data_collection        'Collect  (Nonius BV, 1997-2000)'
_computing_cell_refinement        'HKL Scalepack (Otwinowski & Minor 1997)'
_computing_data_reduction    'HKL Denzo and Scalepack (Otwinowski & Minor 1997)'
_computing_structure_solution     'SHELXS-97 (Sheldrick, 1997)'
_computing_structure_refinement   'SHELXL-97 (Sheldrick, 1997)'
_computing_molecular_graphics     ?
_computing_publication_material   ?
 
_refine_special_details
;
 Refinement of F^2^ against ALL reflections.  The weighted R-factor wR and
 goodness of fit S are based on F^2^, conventional R-factors R are based
 on F, with F set to zero for negative F^2^. The threshold expression of
 F^2^ > 2sigma(F^2^) is used only for calculating R-factors(gt) etc. and is
 not relevant to the choice of reflections for refinement.  R-factors based
 on F^2^ are statistically about twice as large as those based on F, and R-
 factors based on ALL data will be even larger.
;
 
_refine_ls_structure_factor_coef  Fsqd
_refine_ls_matrix_type            full
_refine_ls_weighting_scheme       calc
_refine_ls_weighting_details
 'calc w=1/[\s^2^(Fo^2^)+(0.0653P)^2^+14.1668P] where P=(Fo^2^+2Fc^2^)/3'
_atom_sites_solution_primary      direct
_atom_sites_solution_secondary    difmap
_atom_sites_solution_hydrogens    geom
_refine_ls_hydrogen_treatment     mixed
_refine_ls_extinction_method      none
_refine_ls_extinction_coef        ?
_refine_ls_number_reflns          5710
_refine_ls_number_parameters      434
_refine_ls_number_restraints      1
_refine_ls_R_factor_all           0.0995
_refine_ls_R_factor_gt            0.0614
_refine_ls_wR_factor_ref          0.1685
_refine_ls_wR_factor_gt           0.1422
_refine_ls_goodness_of_fit_ref    1.107
_refine_ls_restrained_S_all       1.108
_refine_ls_shift/su_max           0.001
_refine_ls_shift/su_mean          0.000
 
loop_
 _atom_site_label
 _atom_site_type_symbol
 _atom_site_fract_x
 _atom_site_fract_y
 _atom_site_fract_z
 _atom_site_U_iso_or_equiv
 _atom_site_adp_type
 _atom_site_occupancy
 _atom_site_symmetry_multiplicity
 _atom_site_calc_flag
 _atom_site_refinement_flags
 _atom_site_disorder_assembly
 _atom_site_disorder_group
C1 C 0.5545(8) 0.4584(10) 1.14596(18) 0.057(2) Uani 1 1 d . . .
H1A H 0.5494 0.5529 1.1588 0.068 Uiso 1 1 calc R . .
H1B H 0.5031 0.3863 1.1573 0.068 Uiso 1 1 calc R . .
C2 C 0.6748(7) 0.4041(10) 1.1498(2) 0.059(2) Uani 1 1 d . . .
H2A H 0.6950 0.3987 1.1748 0.071 Uiso 1 1 calc R . .
H2B H 0.7265 0.4795 1.1398 0.071 Uiso 1 1 calc R . .
C3 C 0.5619(6) 0.3481(7) 1.07816(16) 0.0289(15) Uani 1 1 d . . .
C4 C 0.6437(6) 0.2466(8) 1.08864(16) 0.0310(15) Uani 1 1 d . . .
C5 C 0.6027(6) 0.1906(8) 1.02256(16) 0.0297(15) Uani 1 1 d . . .
C6 C 0.6019(6) 0.1330(8) 0.98948(17) 0.0318(16) Uani 1 1 d . . .
C7 C 0.5622(6) 0.0890(7) 0.92301(17) 0.0311(16) Uani 1 1 d . . .
C8 C 0.6465(6) -0.0102(8) 0.93242(17) 0.0343(16) Uani 1 1 d . . .
C9 C 0.5924(12) 0.0126(11) 0.8535(2) 0.096(4) Uani 1 1 d D . .
H9A H 0.5403 -0.0422 0.8371 0.115 Uiso 1 1 calc R . .
H9B H 0.6345 0.0862 0.8397 0.115 Uiso 1 1 calc R . .
C10 C 0.6725(12) -0.085(2) 0.8648(3) 0.169(9) Uani 1 1 d D . .
H10A H 0.7453 -0.0512 0.8542 0.203 Uiso 1 1 calc R . .
H10B H 0.6506 -0.1780 0.8528 0.203 Uiso 1 1 calc R . .
C11 C 0.8948(9) 0.8028(10) 1.1168(2) 0.066(3) Uani 1 1 d . . .
H11A H 0.8537 0.8312 1.1379 0.079 Uiso 1 1 calc R . .
H11B H 0.9525 0.7256 1.1236 0.079 Uiso 1 1 calc R . .
C12 C 0.9599(8) 0.9335(13) 1.1052(2) 0.072(3) Uani 1 1 d . . .
H12A H 1.0108 0.9672 1.1249 0.086 Uiso 1 1 calc R . .
H12B H 0.9027 1.0136 1.1003 0.086 Uiso 1 1 calc R . .
C13 C 0.8663(6) 0.7168(8) 1.04750(16) 0.0344(16) Uani 1 1 d . . .
C14 C 0.9657(6) 0.7928(8) 1.04110(17) 0.0360(17) Uani 1 1 d . . .
C15 C 0.9166(6) 0.6446(8) 0.98414(16) 0.0313(16) Uani 1 1 d . . .
C16 C 0.9128(6) 0.5950(8) 0.95029(17) 0.0337(17) Uani 1 1 d . . .
C17 C 0.8444(6) 0.4978(8) 0.88852(17) 0.0308(16) Uani 1 1 d . . .
C18 C 0.9432(6) 0.5793(8) 0.88323(16) 0.0317(16) Uani 1 1 d . . .
C19 C 0.8391(8) 0.4234(10) 0.8184(2) 0.056(2) Uani 1 1 d . . .
H19A H 0.9030 0.3496 0.8201 0.067 Uiso 1 1 calc R . .
H19B H 0.7888 0.3969 0.7981 0.067 Uiso 1 1 calc R . .
C20 C 0.8917(7) 0.5732(10) 0.8122(2) 0.054(2) Uani 1 1 d . . .
H20A H 0.8293 0.6490 0.8127 0.065 Uiso 1 1 calc R . .
H20B H 0.9238 0.5745 0.7888 0.065 Uiso 1 1 calc R . .
C21 C 0.1452(7) -0.1449(9) 0.78189(19) 0.050(2) Uani 1 1 d . . .
H21A H 0.0722 -0.2015 0.7818 0.074 Uiso 1 1 calc R . .
H21B H 0.1572 -0.0957 0.8043 0.074 Uiso 1 1 calc R . .
H21C H 0.2105 -0.2123 0.7779 0.074 Uiso 1 1 calc R . .
C22 C 0.1384(6) -0.0273(8) 0.75298(19) 0.0401(18) Uani 1 1 d . . .
H22A H 0.0713 0.0388 0.7571 0.048 Uiso 1 1 calc R . .
H22B H 0.1230 -0.0782 0.7307 0.048 Uiso 1 1 calc R . .
C23 C 0.2287(6) 0.1664(8) 0.71732(17) 0.0394(18) Uani 1 1 d . . .
H23A H 0.2210 0.1001 0.6970 0.047 Uiso 1 1 calc R . .
H23B H 0.1535 0.2191 0.7194 0.047 Uiso 1 1 calc R . .
C24 C 0.3241(7) 0.2811(9) 0.7106(2) 0.049(2) Uani 1 1 d . . .
H24A H 0.3034 0.3368 0.6896 0.073 Uiso 1 1 calc R . .
H24B H 0.3987 0.2302 0.7077 0.073 Uiso 1 1 calc R . .
H24C H 0.3311 0.3495 0.7302 0.073 Uiso 1 1 calc R . .
C25 C 0.6537(6) -0.1276(9) 0.77011(16) 0.0334(16) Uani 1 1 d . . .
C26 C 0.8504(6) 0.0306(8) 0.79154(17) 0.0327(16) Uani 1 1 d . . .
C27 C 0.8507(6) 0.1758(9) 0.73128(18) 0.0355(17) Uani 1 1 d . . .
N1 N 0.2500 0.0697(9) 0.7500 0.0298(18) Uani 1 2 d S . .
N2 N 0.5957(6) -0.2183(8) 0.78270(17) 0.0494(17) Uani 1 1 d . . .
N3 N 0.9109(6) 0.0351(8) 0.81605(16) 0.0534(18) Uani 1 1 d . . .
N4 N 0.9147(6) 0.2611(8) 0.71948(18) 0.0518(18) Uani 1 1 d . . .
O1 O 0.0587(5) 0.5336(6) 0.72967(14) 0.0518(14) Uani 1 1 d . . .
S1 S 0.49549(16) 0.4899(2) 1.10243(5) 0.0394(5) Uani 1 1 d . . .
S2 S 0.71112(18) 0.2232(2) 1.13058(5) 0.0469(5) Uani 1 1 d . . .
S3 S 0.51188(16) 0.3412(2) 1.03416(4) 0.0354(4) Uani 1 1 d . . .
S4 S 0.69546(15) 0.1210(2) 1.05657(4) 0.0362(4) Uani 1 1 d . . .
S5 S 0.50849(16) 0.2055(2) 0.95616(4) 0.0364(4) Uani 1 1 d . . .
S6 S 0.69520(16) -0.0127(2) 0.97692(5) 0.0375(4) Uani 1 1 d . . .
S7 S 0.49651(18) 0.1195(2) 0.88113(4) 0.0422(5) Uani 1 1 d . . .
S8 S 0.71760(19) -0.1420(2) 0.90609(5) 0.0522(6) Uani 1 1 d . . .
S9 S 0.78611(18) 0.7169(2) 1.08633(5) 0.0468(5) Uani 1 1 d . . .
S10 S 1.0482(2) 0.9159(3) 1.06870(5) 0.0587(6) Uani 1 1 d . . .
S11 S 0.81094(16) 0.5928(2) 1.01478(5) 0.0389(5) Uani 1 1 d . . .
S12 S 1.02803(16) 0.7650(2) 1.00026(4) 0.0389(5) Uani 1 1 d . . .
S13 S 0.80312(15) 0.4753(2) 0.93262(5) 0.0373(4) Uani 1 1 d . . .
S14 S 1.01902(15) 0.6514(2) 0.92055(4) 0.0350(4) Uani 1 1 d . . .
S15 S 0.75210(17) 0.4068(3) 0.85710(5) 0.0493(6) Uani 1 1 d . . .
S16 S 1.00754(18) 0.6236(3) 0.84355(5) 0.0563(6) Uani 1 1 d . . .
Co1 Co 0.7500 0.02637(15) 0.7500 0.0310(3) Uani 1 2 d S . .
 
loop_
 _atom_site_aniso_label
 _atom_site_aniso_U_11
 _atom_site_aniso_U_22
 _atom_site_aniso_U_33
 _atom_site_aniso_U_23
 _atom_site_aniso_U_13
 _atom_site_aniso_U_12
C1 0.095(7) 0.050(5) 0.025(4) -0.006(4) -0.007(4) 0.025(5)
C2 0.059(6) 0.076(6) 0.039(5) -0.016(4) -0.019(4) 0.010(5)
C3 0.037(4) 0.028(4) 0.022(3) 0.004(3) -0.003(3) -0.004(3)
C4 0.031(4) 0.035(4) 0.026(3) -0.005(3) 0.000(3) -0.002(3)
C5 0.027(4) 0.035(4) 0.027(3) -0.002(3) 0.003(3) 0.007(3)
C6 0.032(4) 0.032(4) 0.031(4) -0.001(3) 0.001(3) 0.004(3)
C7 0.035(4) 0.026(4) 0.032(4) -0.004(3) 0.003(3) 0.006(3)
C8 0.040(4) 0.033(4) 0.030(4) -0.008(3) 0.003(3) 0.000(4)
C9 0.194(13) 0.068(7) 0.028(5) 0.003(4) 0.029(6) 0.071(8)
C10 0.157(12) 0.32(2) 0.031(6) -0.029(9) -0.018(7) 0.169(15)
C11 0.106(8) 0.059(6) 0.034(5) 0.006(4) 0.006(5) -0.019(6)
C12 0.052(6) 0.118(9) 0.045(5) -0.009(5) -0.003(4) -0.013(6)
C13 0.043(4) 0.038(4) 0.023(3) 0.000(3) 0.009(3) 0.008(4)
C14 0.040(4) 0.042(4) 0.027(4) 0.001(3) 0.006(3) -0.011(4)
C15 0.030(4) 0.038(4) 0.027(3) -0.001(3) 0.006(3) 0.001(3)
C16 0.028(4) 0.039(4) 0.034(4) 0.004(3) 0.000(3) -0.002(3)
C17 0.026(4) 0.033(4) 0.034(4) -0.001(3) 0.002(3) 0.001(3)
C18 0.038(4) 0.036(4) 0.021(3) -0.005(3) -0.001(3) -0.007(3)
C19 0.061(6) 0.067(6) 0.040(5) -0.009(4) 0.001(4) -0.024(5)
C20 0.046(5) 0.083(7) 0.034(4) 0.001(4) -0.003(4) -0.009(5)
C21 0.051(5) 0.057(5) 0.041(4) 0.014(4) 0.001(4) -0.006(4)
C22 0.038(4) 0.047(5) 0.035(4) 0.005(3) -0.002(3) -0.009(4)
C23 0.048(5) 0.046(5) 0.025(4) 0.000(3) -0.004(3) 0.001(4)
C24 0.057(5) 0.051(5) 0.039(4) 0.001(4) 0.004(4) -0.007(4)
C25 0.037(4) 0.039(4) 0.023(3) -0.004(3) -0.008(3) 0.006(4)
C26 0.041(4) 0.029(4) 0.028(4) -0.001(3) 0.000(3) 0.002(3)
C27 0.034(4) 0.037(4) 0.035(4) 0.002(3) -0.007(3) -0.001(4)
N1 0.027(4) 0.028(4) 0.034(4) 0.000 0.001(3) 0.000
N2 0.059(4) 0.043(4) 0.047(4) 0.006(3) 0.006(3) -0.009(4)
N3 0.054(4) 0.070(5) 0.035(4) -0.011(3) -0.010(3) 0.013(4)
N4 0.039(4) 0.049(4) 0.067(5) 0.015(4) -0.003(3) 0.003(3)
O1 0.052(3) 0.049(3) 0.053(3) 0.003(3) -0.006(3) 0.008(3)
S1 0.0427(11) 0.0433(11) 0.0318(10) -0.0098(8) -0.0046(8) 0.0100(9)
S2 0.0556(13) 0.0481(12) 0.0356(11) -0.0054(9) -0.0181(9) 0.0116(10)
S3 0.0433(11) 0.0373(11) 0.0254(9) -0.0011(8) -0.0025(7) 0.0086(9)
S4 0.0353(10) 0.0426(11) 0.0304(9) -0.0044(8) -0.0040(7) 0.0112(9)
S5 0.0470(11) 0.0371(10) 0.0252(9) -0.0021(7) -0.0002(7) 0.0108(9)
S6 0.0369(10) 0.0443(11) 0.0312(9) -0.0039(8) -0.0006(7) 0.0101(9)
S7 0.0579(13) 0.0435(11) 0.0249(9) -0.0053(8) -0.0030(8) 0.0033(10)
S8 0.0648(14) 0.0490(13) 0.0431(12) -0.0137(10) 0.0081(10) 0.0134(11)
S9 0.0484(12) 0.0564(13) 0.0366(10) 0.0027(9) 0.0162(8) 0.0022(10)
S10 0.0756(16) 0.0636(15) 0.0378(11) -0.0171(10) 0.0133(10) -0.0273(13)
S11 0.0319(10) 0.0519(12) 0.0333(10) 0.0005(8) 0.0037(7) -0.0053(9)
S12 0.0409(11) 0.0489(12) 0.0274(9) -0.0033(8) 0.0071(8) -0.0141(9)
S13 0.0318(10) 0.0489(12) 0.0313(9) -0.0003(8) 0.0015(7) -0.0082(9)
S14 0.0352(10) 0.0428(11) 0.0268(9) -0.0017(8) 0.0003(7) -0.0092(9)
S15 0.0385(11) 0.0721(15) 0.0375(11) -0.0162(10) 0.0057(8) -0.0214(11)
S16 0.0476(12) 0.0947(18) 0.0265(10) 0.0001(10) 0.0015(8) -0.0320(12)
Co1 0.0327(7) 0.0322(8) 0.0278(7) 0.000 -0.0038(5) 0.000
 
_geom_special_details
;
 All esds (except the esd in the dihedral angle between two l.s. planes)
 are estimated using the full covariance matrix.  The cell esds are taken
 into account individually in the estimation of esds in distances, angles
 and torsion angles; correlations between esds in cell parameters are only
 used when they are defined by crystal symmetry.  An approximate (isotropic)
 treatment of cell esds is used for estimating esds involving l.s. planes.
;
 
loop_
 _geom_bond_atom_site_label_1
 _geom_bond_atom_site_label_2
 _geom_bond_distance
 _geom_bond_site_symmetry_2
 _geom_bond_publ_flag
C1 C2 1.437(11) . ?
C1 S1 1.781(7) . ?
C2 S2 1.809(8) . ?
C3 C4 1.335(9) . ?
C3 S1 1.738(7) . ?
C3 S3 1.745(6) . ?
C4 S2 1.752(6) . ?
C4 S4 1.760(7) . ?
C5 C6 1.355(9) . ?
C5 S4 1.744(6) . ?
C5 S3 1.742(7) . ?
C6 S6 1.737(7) . ?
C6 S5 1.738(7) . ?
C7 C8 1.330(9) . ?
C7 S5 1.749(7) . ?
C7 S7 1.751(7) . ?
C8 S8 1.746(7) . ?
C8 S6 1.758(7) . ?
C9 C10 1.306(13) . ?
C9 S7 1.796(9) . ?
C10 S8 1.707(10) . ?
C11 C12 1.444(12) . ?
C11 S9 1.819(9) . ?
C12 S10 1.739(8) . ?
C13 C14 1.332(9) . ?
C13 S11 1.754(7) . ?
C13 S9 1.753(6) . ?
C14 S12 1.740(7) . ?
C14 S10 1.753(7) . ?
C15 C16 1.357(9) . ?
C15 S12 1.737(7) . ?
C15 S11 1.751(6) . ?
C16 S13 1.741(7) . ?
C16 S14 1.743(7) . ?
C17 C18 1.344(9) . ?
C17 S15 1.750(7) . ?
C17 S13 1.763(7) . ?
C18 S16 1.737(6) . ?
C18 S14 1.748(6) . ?
C19 C20 1.473(11) . ?
C19 S15 1.796(8) . ?
C20 S16 1.791(7) . ?
C21 C22 1.512(10) . ?
C22 N1 1.525(8) . ?
C23 C24 1.503(10) . ?
C23 N1 1.519(8) . ?
C25 N2 1.147(9) . ?
C25 Co1 1.913(8) . ?
C26 N3 1.135(8) . ?
C26 Co1 1.908(7) . ?
C27 N4 1.144(9) . ?
C27 Co1 1.893(8) . ?
N1 C23 1.519(8) 2_556 ?
N1 C22 1.525(8) 2_556 ?
Co1 C27 1.893(8) 2_656 ?
Co1 C26 1.908(7) 2_656 ?
Co1 C25 1.913(8) 2_656 ?
 
loop_
 _geom_angle_atom_site_label_1
 _geom_angle_atom_site_label_2
 _geom_angle_atom_site_label_3
 _geom_angle
 _geom_angle_site_symmetry_1
 _geom_angle_site_symmetry_3
 _geom_angle_publ_flag
C2 C1 S1 117.7(6) . . ?
C1 C2 S2 118.6(6) . . ?
C4 C3 S1 129.0(5) . . ?
C4 C3 S3 117.2(5) . . ?
S1 C3 S3 113.7(4) . . ?
C3 C4 S2 128.4(5) . . ?
C3 C4 S4 117.2(5) . . ?
S2 C4 S4 114.3(4) . . ?
C6 C5 S4 122.6(5) . . ?
C6 C5 S3 122.4(5) . . ?
S4 C5 S3 115.0(4) . . ?
C5 C6 S6 123.2(5) . . ?
C5 C6 S5 121.4(5) . . ?
S6 C6 S5 115.4(4) . . ?
C8 C7 S5 117.0(5) . . ?
C8 C7 S7 128.3(5) . . ?
S5 C7 S7 114.7(4) . . ?
C7 C8 S8 128.4(5) . . ?
C7 C8 S6 117.5(5) . . ?
S8 C8 S6 114.1(4) . . ?
C10 C9 S7 125.1(7) . . ?
C9 C10 S8 132.5(9) . . ?
C12 C11 S9 118.5(6) . . ?
C11 C12 S10 118.6(8) . . ?
C14 C13 S11 117.7(5) . . ?
C14 C13 S9 127.6(5) . . ?
S11 C13 S9 114.6(4) . . ?
C13 C14 S12 117.1(5) . . ?
C13 C14 S10 129.3(5) . . ?
S12 C14 S10 113.6(4) . . ?
C16 C15 S12 122.1(5) . . ?
C16 C15 S11 123.0(5) . . ?
S12 C15 S11 115.0(4) . . ?
C15 C16 S13 124.1(5) . . ?
C15 C16 S14 121.4(5) . . ?
S13 C16 S14 114.5(4) . . ?
C18 C17 S15 128.2(5) . . ?
C18 C17 S13 116.6(5) . . ?
S15 C17 S13 115.2(4) . . ?
C17 C18 S16 128.3(5) . . ?
C17 C18 S14 117.1(5) . . ?
S16 C18 S14 114.5(4) . . ?
C20 C19 S15 116.0(6) . . ?
C19 C20 S16 113.7(6) . . ?
C21 C22 N1 114.8(6) . . ?
C24 C23 N1 115.1(5) . . ?
N2 C25 Co1 178.8(6) . . ?
N3 C26 Co1 178.9(7) . . ?
N4 C27 Co1 177.0(7) . . ?
C23 N1 C23 111.6(7) . 2_556 ?
C23 N1 C22 105.6(4) . . ?
C23 N1 C22 111.3(4) 2_556 . ?
C23 N1 C22 111.3(4) . 2_556 ?
C23 N1 C22 105.6(4) 2_556 2_556 ?
C22 N1 C22 111.6(7) . 2_556 ?
C3 S1 C1 103.1(3) . . ?
C4 S2 C2 99.6(3) . . ?
C5 S3 C3 95.5(3) . . ?
C5 S4 C4 95.0(3) . . ?
C6 S5 C7 95.3(3) . . ?
C6 S6 C8 94.8(3) . . ?
C7 S7 C9 101.9(4) . . ?
C10 S8 C8 101.6(5) . . ?
C13 S9 C11 100.5(4) . . ?
C12 S10 C14 103.2(4) . . ?
C15 S11 C13 94.3(3) . . ?
C15 S12 C14 95.4(3) . . ?
C16 S13 C17 95.3(3) . . ?
C16 S14 C18 95.5(3) . . ?
C17 S15 C19 101.2(3) . . ?
C18 S16 C20 102.0(3) . . ?
C27 Co1 C27 91.5(4) . 2_656 ?
C27 Co1 C26 91.1(3) . 2_656 ?
C27 Co1 C26 87.3(3) 2_656 2_656 ?
C27 Co1 C26 87.3(3) . . ?
C27 Co1 C26 91.1(3) 2_656 . ?
C26 Co1 C26 177.7(4) 2_656 . ?
C27 Co1 C25 177.6(3) . . ?
C27 Co1 C25 89.6(3) 2_656 . ?
C26 Co1 C25 91.0(3) 2_656 . ?
C26 Co1 C25 90.6(3) . . ?
C27 Co1 C25 89.6(3) . 2_656 ?
C27 Co1 C25 177.6(3) 2_656 2_656 ?
C26 Co1 C25 90.6(3) 2_656 2_656 ?
C26 Co1 C25 91.0(3) . 2_656 ?
C25 Co1 C25 89.4(4) . 2_656 ?
 
_diffrn_measured_fraction_theta_max    0.856
_diffrn_reflns_theta_full              25.06
_diffrn_measured_fraction_theta_full   0.856
_refine_diff_density_max    0.745
_refine_diff_density_min   -0.706
_refine_diff_density_rms    0.221

 
 
data_1_100k
 
_audit_creation_method            SHELXL-97
_chemical_name_systematic
;
 ?
;
_chemical_name_common             ?
_chemical_melting_point           ?
_chemical_formula_moiety          ?
_chemical_formula_sum
 'C54 H56 Co N7 O2 S32'
_chemical_formula_weight          1919.91
 
loop_
 _atom_type_symbol
 _atom_type_description
 _atom_type_scat_dispersion_real
 _atom_type_scat_dispersion_imag
 _atom_type_scat_source
 'C'  'C'   0.0033   0.0016
 'International Tables Vol C Tables 4.2.6.8 and 6.1.1.4'
 'H'  'H'   0.0000   0.0000
 'International Tables Vol C Tables 4.2.6.8 and 6.1.1.4'
 'N'  'N'   0.0061   0.0033
 'International Tables Vol C Tables 4.2.6.8 and 6.1.1.4'
 'O'  'O'   0.0106   0.0060
 'International Tables Vol C Tables 4.2.6.8 and 6.1.1.4'
 'S'  'S'   0.1246   0.1234
 'International Tables Vol C Tables 4.2.6.8 and 6.1.1.4'
 'Co'  'Co'   0.3494   0.9721
 'International Tables Vol C Tables 4.2.6.8 and 6.1.1.4'
 
_symmetry_cell_setting            Monoclinic
_symmetry_space_group_name_H-M    P2/n
 
loop_
 _symmetry_equiv_pos_as_xyz
 'x, y, z'
 '-x+1/2, y, -z+1/2'
 '-x, -y, -z'
 'x-1/2, -y, z-1/2'
 
_cell_length_a                    10.9798(5)
_cell_length_b                    8.8047(4)
_cell_length_c                    38.5794(18)
_cell_angle_alpha                 90.00
_cell_angle_beta                  90.152(2)
_cell_angle_gamma                 90.00
_cell_volume                      3729.6(3)
_cell_formula_units_Z             2
_cell_measurement_temperature     100(2)
_cell_measurement_reflns_used     ?
_cell_measurement_theta_min       ?
_cell_measurement_theta_max       ?
 
_exptl_crystal_description        block
_exptl_crystal_colour             black
_exptl_crystal_size_max           ?
_exptl_crystal_size_mid           ?
_exptl_crystal_size_min           ?
_exptl_crystal_density_meas       ?
_exptl_crystal_density_diffrn     1.710
_exptl_crystal_density_method     'not measured'
_exptl_crystal_F_000              1968
_exptl_absorpt_coefficient_mu     1.174
_exptl_absorpt_correction_type    None
_exptl_absorpt_correction_T_min   ?
_exptl_absorpt_correction_T_max   ?
_exptl_absorpt_process_details    ?
 
_exptl_special_details
;
 ?
;
 
_diffrn_ambient_temperature       100(2)
_diffrn_radiation_wavelength      0.71073
_diffrn_radiation_type            MoK\a
_diffrn_radiation_source          'fine-focus sealed tube'
_diffrn_radiation_monochromator   graphite
_diffrn_measurement_device_type   ?
_diffrn_measurement_method        ?
_diffrn_detector_area_resol_mean  ?
_diffrn_standards_number          ?
_diffrn_standards_interval_count  ?
_diffrn_standards_interval_time   ?
_diffrn_standards_decay_%         ?
_diffrn_reflns_number             17466
_diffrn_reflns_av_R_equivalents   0.0323
_diffrn_reflns_av_sigmaI/netI     0.0473
_diffrn_reflns_limit_h_min        -12
_diffrn_reflns_limit_h_max        13
_diffrn_reflns_limit_k_min        -11
_diffrn_reflns_limit_k_max        4
_diffrn_reflns_limit_l_min        -47
_diffrn_reflns_limit_l_max        48
_diffrn_reflns_theta_min          1.06
_diffrn_reflns_theta_max          26.46
_reflns_number_total              7643
_reflns_number_gt                 6098
_reflns_threshold_expression      >2sigma(I)
 
_computing_data_collection        ?
_computing_cell_refinement        ?
_computing_data_reduction         ?
_computing_structure_solution     ?
_computing_structure_refinement   'SHELXL-97 (Sheldrick, 1997)'
_computing_molecular_graphics     ?
_computing_publication_material   ?
 
_refine_special_details
;
 Refinement of F^2^ against ALL reflections.  The weighted R-factor wR and
 goodness of fit S are based on F^2^, conventional R-factors R are based
 on F, with F set to zero for negative F^2^. The threshold expression of
 F^2^ > 2sigma(F^2^) is used only for calculating R-factors(gt) etc. and is
 not relevant to the choice of reflections for refinement.  R-factors based
 on F^2^ are statistically about twice as large as those based on F, and R-
 factors based on ALL data will be even larger.
;
 
_refine_ls_structure_factor_coef  Fsqd
_refine_ls_matrix_type            full
_refine_ls_weighting_scheme       calc
_refine_ls_weighting_details
 'calc w=1/[\s^2^(Fo^2^)+(0.1137P)^2^+34.4041P] where P=(Fo^2^+2Fc^2^)/3'
_atom_sites_solution_primary      direct
_atom_sites_solution_secondary    difmap
_atom_sites_solution_hydrogens    geom
_refine_ls_hydrogen_treatment     mixed
_refine_ls_extinction_method      none
_refine_ls_extinction_coef        ?
_refine_ls_number_reflns          7643
_refine_ls_number_parameters      408
_refine_ls_number_restraints      0
_refine_ls_R_factor_all           0.0908
_refine_ls_R_factor_gt            0.0727
_refine_ls_wR_factor_ref          0.2200
_refine_ls_wR_factor_gt           0.1984
_refine_ls_goodness_of_fit_ref    1.052
_refine_ls_restrained_S_all       1.052
_refine_ls_shift/su_max           0.044
_refine_ls_shift/su_mean          0.001
 
loop_
 _atom_site_label
 _atom_site_type_symbol
 _atom_site_fract_x
 _atom_site_fract_y
 _atom_site_fract_z
 _atom_site_U_iso_or_equiv
 _atom_site_adp_type
 _atom_site_occupancy
 _atom_site_symmetry_multiplicity
 _atom_site_calc_flag
 _atom_site_refinement_flags
 _atom_site_disorder_assembly
 _atom_site_disorder_group
C1 C 0.5689(9) 0.4468(10) 1.1423(2) 0.042(2) Uani 1 1 d . . .
H1A H 0.5678 0.5471 1.1538 0.050 Uiso 1 1 calc R . .
H1B H 0.5233 0.3753 1.1572 0.050 Uiso 1 1 calc R . .
C2 C 0.6928(8) 0.3962(10) 1.1404(2) 0.044(2) Uani 1 1 d . . .
H2A H 0.7291 0.4037 1.1639 0.052 Uiso 1 1 calc R . .
H2B H 0.7382 0.4666 1.1252 0.052 Uiso 1 1 calc R . .
C3 C 0.5569(5) 0.3261(7) 1.07619(16) 0.0180(12) Uani 1 1 d . . .
C4 C 0.6451(6) 0.2238(8) 1.08453(17) 0.0223(13) Uani 1 1 d . . .
C5 C 0.6004(5) 0.1789(7) 1.02038(16) 0.0177(12) Uani 1 1 d . . .
C6 C 0.6024(5) 0.1267(7) 0.98639(16) 0.0179(12) Uani 1 1 d . . .
C7 C 0.5726(6) 0.0953(7) 0.92128(16) 0.0179(12) Uani 1 1 d . . .
C8 C 0.6632(5) -0.0012(7) 0.92990(17) 0.0212(13) Uani 1 1 d . . .
C9 C 0.6349(8) 0.0533(8) 0.8542(2) 0.0365(19) Uani 1 1 d . . .
H9A H 0.6110 0.0574 0.8295 0.044 Uiso 1 1 calc R . .
H9B H 0.7070 0.1195 0.8573 0.044 Uiso 1 1 calc R . .
C10 C 0.6696(7) -0.1077(8) 0.86329(18) 0.0294(16) Uani 1 1 d . . .
H10A H 0.7237 -0.1479 0.8450 0.035 Uiso 1 1 calc R . .
H10B H 0.5949 -0.1708 0.8635 0.035 Uiso 1 1 calc R . .
C11 C 0.8802(13) 0.7606(14) 1.1133(3) 0.090(5) Uani 1 1 d . . .
H11A H 0.8419 0.8097 1.1336 0.109 Uiso 1 1 calc R . .
H11B H 0.9099 0.6604 1.1213 0.109 Uiso 1 1 calc R . .
C12 C 0.9809(8) 0.8436(17) 1.1060(2) 0.068(4) Uani 1 1 d . . .
H12A H 1.0517 0.7747 1.1082 0.081 Uiso 1 1 calc R . .
H12B H 0.9891 0.9208 1.1246 0.081 Uiso 1 1 calc R . .
C13 C 0.8401(5) 0.7170(7) 1.04463(15) 0.0159(12) Uani 1 1 d . . .
C14 C 0.9361(5) 0.8041(7) 1.03790(15) 0.0160(12) Uani 1 1 d . . .
C15 C 0.9064(5) 0.6385(7) 0.98337(15) 0.0162(12) Uani 1 1 d . . .
C16 C 0.9090(5) 0.5912(6) 0.95018(15) 0.0147(11) Uani 1 1 d . . .
C17 C 0.8380(5) 0.5218(7) 0.88824(16) 0.0169(12) Uani 1 1 d . . .
C18 C 0.9366(5) 0.6081(7) 0.88402(15) 0.0149(11) Uani 1 1 d . . .
C19 C 0.8583(6) 0.4459(8) 0.82049(16) 0.0241(14) Uani 1 1 d . . .
H19A H 0.9281 0.3810 0.8272 0.029 Uiso 1 1 calc R . .
H19B H 0.8208 0.4014 0.7994 0.029 Uiso 1 1 calc R . .
C20 C 0.9040(6) 0.6040(8) 0.81225(16) 0.0227(14) Uani 1 1 d . . .
H20A H 0.8331 0.6707 0.8078 0.027 Uiso 1 1 calc R . .
H20B H 0.9528 0.5997 0.7907 0.027 Uiso 1 1 calc R . .
C25 C 0.6520(5) -0.0943(7) 0.77032(16) 0.0196(13) Uani 1 1 d . . .
C26 C 0.8512(6) 0.0598(7) 0.79029(17) 0.0195(13) Uani 1 1 d . . .
C27 C 0.8498(5) 0.2100(7) 0.72999(17) 0.0201(13) Uani 1 1 d . . .
N2 N 0.5911(5) -0.1851(7) 0.78294(16) 0.0288(13) Uani 1 1 d . . .
N3 N 0.9123(5) 0.0642(7) 0.81427(15) 0.0264(13) Uani 1 1 d . . .
N4 N 0.9103(5) 0.3007(7) 0.71756(17) 0.0283(13) Uani 1 1 d . . .
O1 O 0.0574(5) 0.5622(6) 0.72606(15) 0.0363(13) Uani 1 1 d . . .
S1 S 0.48915(15) 0.4638(2) 1.10181(4) 0.0260(4) Uani 1 1 d . . .
S2 S 0.7156(2) 0.2012(2) 1.12434(5) 0.0383(5) Uani 1 1 d . . .
S3 S 0.50458(13) 0.32262(17) 1.03369(4) 0.0165(3) Uani 1 1 d . . .
S4 S 0.69653(14) 0.10740(19) 1.05141(4) 0.0227(4) Uani 1 1 d . . .
S5 S 0.51006(13) 0.20151(17) 0.95494(4) 0.0179(3) Uani 1 1 d . . .
S6 S 0.70514(14) -0.00893(19) 0.97334(4) 0.0219(4) Uani 1 1 d . . .
S7 S 0.51107(15) 0.12668(18) 0.88025(4) 0.0212(3) Uani 1 1 d . . .
S8 S 0.74461(15) -0.1271(2) 0.90416(5) 0.0310(4) Uani 1 1 d . . .
S9 S 0.75971(15) 0.7226(2) 1.08339(4) 0.0269(4) Uani 1 1 d . . .
S10 S 0.99583(16) 0.94142(19) 1.06524(4) 0.0251(4) Uani 1 1 d . . .
S11 S 0.80279(13) 0.57320(17) 1.01447(4) 0.0165(3) Uani 1 1 d . . .
S12 S 1.01774(13) 0.76310(18) 0.99974(4) 0.0178(3) Uani 1 1 d . . .
S13 S 0.80526(14) 0.46345(18) 0.93124(4) 0.0195(3) Uani 1 1 d . . .
S14 S 1.02335(13) 0.64924(18) 0.92125(4) 0.0172(3) Uani 1 1 d . . .
S15 S 0.74765(14) 0.4459(2) 0.85513(4) 0.0230(4) Uani 1 1 d . . .
S16 S 0.99543(17) 0.6873(2) 0.84610(4) 0.0331(4) Uani 1 1 d . . .
Co1 Co 0.7500 0.05786(13) 0.7500 0.0147(3) Uani 1 2 d S . .
N1 N 0.2500 0.0906(9) 0.7500 0.0206(16) Uani 1 2 d S . .
C21 C 0.1796 -0.1377 0.7822 0.142 Uani 1 1 d . . .
H21A H 0.1108 -0.2068 0.7858 0.213 Uiso 1 1 calc R . .
H21B H 0.2033 -0.0926 0.8044 0.213 Uiso 1 1 calc R . .
H21C H 0.2485 -0.1944 0.7726 0.213 Uiso 1 1 calc R . .
C22 C 0.1377 0.0037 0.7539 0.067 Uani 1 1 d . . .
H22A H 0.1105 -0.0390 0.7314 0.081 Uiso 1 1 calc R . .
H22B H 0.0717 0.0672 0.7636 0.081 Uiso 1 1 calc R . .
C23 C 0.2346 0.2009 0.7185 0.076 Uani 1 1 d . . .
H23A H 0.2304 0.1395 0.6971 0.091 Uiso 1 1 calc R . .
H23B H 0.1558 0.2544 0.7210 0.091 Uiso 1 1 calc R . .
C24 C 0.3202(13) 0.303(3) 0.7148(4) 0.24(2) Uani 1 1 d . . .
H24A H 0.3036 0.3636 0.6941 0.367 Uiso 1 1 calc R . .
H24B H 0.3991 0.2515 0.7123 0.367 Uiso 1 1 calc R . .
H24C H 0.3222 0.3686 0.7353 0.367 Uiso 1 1 calc R . .
 
loop_
 _atom_site_aniso_label
 _atom_site_aniso_U_11
 _atom_site_aniso_U_22
 _atom_site_aniso_U_33
 _atom_site_aniso_U_23
 _atom_site_aniso_U_13
 _atom_site_aniso_U_12
C1 0.069(6) 0.036(4) 0.020(4) 0.005(3) -0.016(4) -0.010(4)
C2 0.051(5) 0.044(5) 0.035(4) 0.001(4) -0.020(4) -0.007(4)
C3 0.018(3) 0.022(3) 0.014(3) 0.000(2) 0.000(2) -0.004(2)
C4 0.023(3) 0.023(3) 0.021(3) 0.001(3) -0.007(3) -0.005(3)
C5 0.015(3) 0.017(3) 0.021(3) -0.001(2) 0.000(2) 0.002(2)
C6 0.014(3) 0.019(3) 0.021(3) 0.000(2) -0.001(2) 0.003(2)
C7 0.022(3) 0.013(3) 0.019(3) -0.006(2) 0.004(2) 0.000(2)
C8 0.016(3) 0.022(3) 0.025(3) -0.011(3) 0.005(2) 0.000(2)
C9 0.056(5) 0.022(4) 0.031(4) -0.002(3) 0.027(4) 0.008(3)
C10 0.051(4) 0.019(3) 0.019(3) -0.005(3) 0.000(3) 0.006(3)
C11 0.154(12) 0.085(8) 0.032(5) 0.033(5) -0.047(6) -0.087(9)
C12 0.042(5) 0.149(12) 0.012(4) 0.010(5) -0.003(3) -0.019(6)
C13 0.018(3) 0.017(3) 0.013(3) 0.000(2) 0.000(2) 0.003(2)
C14 0.020(3) 0.016(3) 0.012(3) 0.000(2) 0.000(2) 0.000(2)
C15 0.014(3) 0.019(3) 0.015(3) 0.002(2) 0.001(2) -0.001(2)
C16 0.016(3) 0.012(3) 0.016(3) 0.000(2) -0.002(2) -0.001(2)
C17 0.018(3) 0.018(3) 0.015(3) 0.002(2) 0.001(2) 0.001(2)
C18 0.018(3) 0.017(3) 0.009(3) -0.004(2) -0.004(2) 0.003(2)
C19 0.026(3) 0.034(4) 0.012(3) -0.006(3) 0.001(2) 0.006(3)
C20 0.017(3) 0.039(4) 0.012(3) -0.001(3) -0.001(2) 0.000(3)
C25 0.016(3) 0.024(3) 0.019(3) 0.000(3) -0.001(2) 0.004(2)
C26 0.020(3) 0.018(3) 0.021(3) -0.003(2) 0.002(3) 0.005(2)
C27 0.014(3) 0.025(3) 0.021(3) -0.002(3) -0.005(2) 0.002(2)
N2 0.032(3) 0.026(3) 0.029(3) 0.003(3) 0.005(3) -0.002(3)
N3 0.027(3) 0.028(3) 0.024(3) -0.002(2) -0.010(2) 0.006(2)
N4 0.020(3) 0.024(3) 0.041(4) 0.003(3) -0.001(2) -0.001(2)
O1 0.040(3) 0.026(3) 0.042(3) 0.004(2) -0.018(2) -0.005(2)
S1 0.0234(8) 0.0362(10) 0.0184(8) -0.0118(7) 0.0001(6) -0.0011(7)
S2 0.0525(12) 0.0299(10) 0.0324(10) 0.0069(8) -0.0284(9) -0.0097(9)
S3 0.0167(7) 0.0191(7) 0.0138(7) -0.0023(6) -0.0005(5) 0.0037(5)
S4 0.0188(7) 0.0217(8) 0.0277(9) -0.0001(7) -0.0062(6) 0.0037(6)
S5 0.0184(7) 0.0197(7) 0.0155(7) -0.0017(6) 0.0018(6) 0.0063(6)
S6 0.0166(7) 0.0243(8) 0.0247(8) -0.0071(6) -0.0026(6) 0.0074(6)
S7 0.0262(8) 0.0225(8) 0.0150(7) -0.0025(6) 0.0031(6) 0.0003(6)
S8 0.0205(8) 0.0382(10) 0.0344(10) -0.0239(8) -0.0059(7) 0.0119(7)
S9 0.0273(8) 0.0401(10) 0.0133(7) 0.0054(7) 0.0065(6) 0.0108(7)
S10 0.0328(9) 0.0211(8) 0.0213(8) -0.0043(6) -0.0094(7) -0.0016(7)
S11 0.0154(7) 0.0198(7) 0.0142(7) 0.0003(6) 0.0013(5) -0.0031(5)
S12 0.0199(7) 0.0219(8) 0.0116(7) -0.0006(6) 0.0020(5) -0.0070(6)
S13 0.0232(8) 0.0213(8) 0.0140(7) 0.0001(6) -0.0008(6) -0.0073(6)
S14 0.0149(7) 0.0251(8) 0.0115(7) 0.0006(6) -0.0011(5) -0.0028(6)
S15 0.0212(8) 0.0315(9) 0.0161(8) -0.0080(6) -0.0010(6) -0.0052(6)
S16 0.0295(9) 0.0568(12) 0.0129(8) 0.0054(8) -0.0021(6) -0.0194(8)
Co1 0.0113(5) 0.0181(6) 0.0146(6) 0.000 -0.0013(4) 0.000
N1 0.013(3) 0.029(4) 0.019(4) 0.000 0.009(3) 0.000
C21 0.250 0.114 0.062 0.010 0.029 -0.029
C22 0.037 0.076 0.089 0.015 0.002 -0.014
C23 0.098 0.064 0.065 0.004 0.003 -0.014
C24 0.064(9) 0.56(6) 0.112(14) -0.17(2) 0.055(10) -0.086(19)
 
_geom_special_details
;
 All esds (except the esd in the dihedral angle between two l.s. planes)
 are estimated using the full covariance matrix.  The cell esds are taken
 into account individually in the estimation of esds in distances, angles
 and torsion angles; correlations between esds in cell parameters are only
 used when they are defined by crystal symmetry.  An approximate (isotropic)
 treatment of cell esds is used for estimating esds involving l.s. planes.
;
 
loop_
 _geom_bond_atom_site_label_1
 _geom_bond_atom_site_label_2
 _geom_bond_distance
 _geom_bond_site_symmetry_2
 _geom_bond_publ_flag
C1 C2 1.433(13) . ?
C1 S1 1.793(8) . ?
C2 S2 1.844(9) . ?
C3 C4 1.361(9) . ?
C3 S1 1.733(6) . ?
C3 S3 1.736(6) . ?
C4 S4 1.733(7) . ?
C4 S2 1.730(7) . ?
C5 C6 1.390(9) . ?
C5 S4 1.714(6) . ?
C5 S3 1.725(6) . ?
C6 S5 1.711(6) . ?
C6 S6 1.719(6) . ?
C7 C8 1.349(9) . ?
C7 S7 1.741(7) . ?
C7 S5 1.743(6) . ?
C8 S8 1.737(6) . ?
C8 S6 1.738(7) . ?
C9 C10 1.509(10) . ?
C9 S7 1.812(7) . ?
C10 S8 1.785(7) . ?
C11 C12 1.354(14) . ?
C11 S9 1.785(10) . ?
C12 S10 1.803(9) . ?
C13 C14 1.329(9) . ?
C13 S9 1.739(6) . ?
C13 S11 1.767(6) . ?
C14 S10 1.732(6) . ?
C14 S12 1.763(6) . ?
C15 C16 1.347(8) . ?
C15 S11 1.753(6) . ?
C15 S12 1.759(6) . ?
C16 S13 1.758(6) . ?
C16 S14 1.758(6) . ?
C17 C18 1.333(9) . ?
C17 S15 1.748(6) . ?
C17 S13 1.774(6) . ?
C18 S16 1.746(6) . ?
C18 S14 1.759(6) . ?
C19 C20 1.514(10) . ?
C19 S15 1.808(6) . ?
C20 S16 1.801(7) . ?
C25 N2 1.151(9) . ?
C25 Co1 1.890(7) . ?
C26 N3 1.142(8) . ?
C26 Co1 1.908(6) . ?
C27 N4 1.145(9) . ?
C27 Co1 1.896(7) . ?
Co1 C25 1.890(7) 2_656 ?
Co1 C27 1.896(7) 2_656 ?
Co1 C26 1.908(6) 2_656 ?
N1 C22 1.459(4) 2_556 ?
N1 C22 1.459(4) . ?
N1 C23 1.563(5) . ?
N1 C23 1.563(5) 2_556 ?
C21 C22 1.7186 . ?
C23 C24 1.31(2) . ?
 
loop_
 _geom_angle_atom_site_label_1
 _geom_angle_atom_site_label_2
 _geom_angle_atom_site_label_3
 _geom_angle
 _geom_angle_site_symmetry_1
 _geom_angle_site_symmetry_3
 _geom_angle_publ_flag
C2 C1 S1 116.4(6) . . ?
C1 C2 S2 115.8(6) . . ?
C4 C3 S1 129.4(5) . . ?
C4 C3 S3 116.4(5) . . ?
S1 C3 S3 114.2(4) . . ?
C3 C4 S4 116.8(5) . . ?
C3 C4 S2 127.1(5) . . ?
S4 C4 S2 116.1(4) . . ?
C6 C5 S4 121.8(5) . . ?
C6 C5 S3 122.3(5) . . ?
S4 C5 S3 115.9(4) . . ?
C5 C6 S5 122.1(5) . . ?
C5 C6 S6 121.2(5) . . ?
S5 C6 S6 116.6(4) . . ?
C8 C7 S7 127.4(5) . . ?
C8 C7 S5 116.5(5) . . ?
S7 C7 S5 116.1(4) . . ?
C7 C8 S8 129.9(5) . . ?
C7 C8 S6 117.1(5) . . ?
S8 C8 S6 113.0(4) . . ?
C10 C9 S7 113.3(5) . . ?
C9 C10 S8 114.2(5) . . ?
C12 C11 S9 124.8(7) . . ?
C11 C12 S10 121.0(7) . . ?
C14 C13 S9 123.8(5) . . ?
C14 C13 S11 117.9(5) . . ?
S9 C13 S11 118.0(3) . . ?
C13 C14 S10 125.6(5) . . ?
C13 C14 S12 116.7(5) . . ?
S10 C14 S12 117.3(3) . . ?
C16 C15 S11 124.4(5) . . ?
C16 C15 S12 121.2(5) . . ?
S11 C15 S12 114.2(3) . . ?
C15 C16 S13 125.3(5) . . ?
C15 C16 S14 122.0(5) . . ?
S13 C16 S14 112.6(3) . . ?
C18 C17 S15 126.0(5) . . ?
C18 C17 S13 116.5(5) . . ?
S15 C17 S13 117.1(3) . . ?
C17 C18 S16 129.2(5) . . ?
C17 C18 S14 117.1(5) . . ?
S16 C18 S14 113.6(3) . . ?
C20 C19 S15 112.3(5) . . ?
C19 C20 S16 114.0(5) . . ?
N2 C25 Co1 178.8(6) . . ?
N3 C26 Co1 178.5(6) . . ?
N4 C27 Co1 179.1(6) . . ?
C3 S1 C1 103.2(4) . . ?
C4 S2 C2 97.5(4) . . ?
C5 S3 C3 95.4(3) . . ?
C5 S4 C4 95.5(3) . . ?
C6 S5 C7 95.1(3) . . ?
C6 S6 C8 94.7(3) . . ?
C7 S7 C9 99.1(4) . . ?
C8 S8 C10 101.9(3) . . ?
C13 S9 C11 100.6(5) . . ?
C14 S10 C12 99.4(5) . . ?
C15 S11 C13 93.8(3) . . ?
C15 S12 C14 94.2(3) . . ?
C16 S13 C17 94.0(3) . . ?
C16 S14 C18 94.1(3) . . ?
C17 S15 C19 99.2(3) . . ?
C18 S16 C20 103.8(3) . . ?
C25 Co1 C25 89.7(4) . 2_656 ?
C25 Co1 C27 179.3(3) . . ?
C25 Co1 C27 90.1(3) 2_656 . ?
C25 Co1 C27 90.1(3) . 2_656 ?
C25 Co1 C27 179.3(3) 2_656 2_656 ?
C27 Co1 C27 90.1(4) . 2_656 ?
C25 Co1 C26 90.8(3) . 2_656 ?
C25 Co1 C26 90.0(3) 2_656 2_656 ?
C27 Co1 C26 89.9(3) . 2_656 ?
C27 Co1 C26 89.4(3) 2_656 2_656 ?
C25 Co1 C26 90.0(3) . . ?
C25 Co1 C26 90.8(3) 2_656 . ?
C27 Co1 C26 89.4(3) . . ?
C27 Co1 C26 89.9(3) 2_656 . ?
C26 Co1 C26 179.0(4) 2_656 . ?
C22 N1 C22 116.7(5) 2_556 . ?
C22 N1 C23 109.61(5) 2_556 . ?
C22 N1 C23 108.43(5) . . ?
C22 N1 C23 108.43(5) 2_556 2_556 ?
C22 N1 C23 109.61(5) . 2_556 ?
C23 N1 C23 103.2(5) . 2_556 ?
N1 C22 C21 102.7(2) . . ?
C24 C23 N1 115.8(10) . . ?
 
_diffrn_measured_fraction_theta_max    0.993
_diffrn_reflns_theta_full              26.46
_diffrn_measured_fraction_theta_full   0.993
_refine_diff_density_max    5.158
_refine_diff_density_min   -2.832
_refine_diff_density_rms    0.286
 
data_2-295K
 
_audit_creation_method            SHELXL-97
_chemical_name_systematic
;
 ?
;
_chemical_name_common             ?
_chemical_melting_point           ?
_chemical_formula_moiety          ?
_chemical_formula_sum
 'C54 H56 Fe N7 O2 S32'
_chemical_formula_weight          1916.83
 
loop_
 _atom_type_symbol
 _atom_type_description
 _atom_type_scat_dispersion_real
 _atom_type_scat_dispersion_imag
 _atom_type_scat_source
 'C'  'C'   0.0033   0.0016
 'International Tables Vol C Tables 4.2.6.8 and 6.1.1.4'
 'H'  'H'   0.0000   0.0000
 'International Tables Vol C Tables 4.2.6.8 and 6.1.1.4'
 'N'  'N'   0.0061   0.0033
 'International Tables Vol C Tables 4.2.6.8 and 6.1.1.4'
 'O'  'O'   0.0106   0.0060
 'International Tables Vol C Tables 4.2.6.8 and 6.1.1.4'
 'S'  'S'   0.1246   0.1234
 'International Tables Vol C Tables 4.2.6.8 and 6.1.1.4'
 'Fe'  'Fe'   0.3463   0.8444
 'International Tables Vol C Tables 4.2.6.8 and 6.1.1.4'
 
_symmetry_cell_setting            monoclinic
_symmetry_space_group_name_H-M    P2/n
 
loop_
 _symmetry_equiv_pos_as_xyz
 'x, y, z'
 '-x+1/2, y, -z+1/2'
 '-x, -y, -z'
 'x-1/2, -y, z-1/2'
 
_cell_length_a                    11.261(5)
_cell_length_b                    8.941(5)
_cell_length_c                    38.433(5)
_cell_angle_alpha                 90.000(5)
_cell_angle_beta                  91.463(5)
_cell_angle_gamma                 90.000(5)
_cell_volume                      3868(3)
_cell_formula_units_Z             2
_cell_measurement_temperature     295
_cell_measurement_reflns_used     ?
_cell_measurement_theta_min       ?
_cell_measurement_theta_max       ?
 
_exptl_crystal_description        ?
_exptl_crystal_colour             ?
_exptl_crystal_size_max           ?
_exptl_crystal_size_mid           ?
_exptl_crystal_size_min           ?
_exptl_crystal_density_meas       ?
_exptl_crystal_density_diffrn     1.646
_exptl_crystal_density_method     'not measured'
_exptl_crystal_F_000              1966
_exptl_absorpt_coefficient_mu     1.105
_exptl_absorpt_correction_type    ?
_exptl_absorpt_correction_T_min   ?
_exptl_absorpt_correction_T_max   ?
_exptl_absorpt_process_details    ?
 
_exptl_special_details
;
 ?
;
 
_diffrn_ambient_temperature       295
_diffrn_radiation_wavelength      0.71069
_diffrn_radiation_type            MoK\a
_diffrn_radiation_source          'fine-focus sealed tube'
_diffrn_radiation_monochromator   graphite
_diffrn_measurement_device_type   ?
_diffrn_measurement_method        ?
_diffrn_detector_area_resol_mean  ?
_diffrn_standards_number          ?
_diffrn_standards_interval_count  ?
_diffrn_standards_interval_time   ?
_diffrn_standards_decay_%         ?
_diffrn_reflns_number             30084
_diffrn_reflns_av_R_equivalents   0.0438
_diffrn_reflns_av_sigmaI/netI     0.0277
_diffrn_reflns_limit_h_min        -9
_diffrn_reflns_limit_h_max        11
_diffrn_reflns_limit_k_min        -9
_diffrn_reflns_limit_k_max        9
_diffrn_reflns_limit_l_min        -39
_diffrn_reflns_limit_l_max        39
_diffrn_reflns_theta_min          1.06
_diffrn_reflns_theta_max          21.54
_reflns_number_total              4389
_reflns_number_gt                 3514
_reflns_threshold_expression      >2sigma(I)
 
_computing_data_collection        'Collect  (Nonius BV, 1997-2000)'
_computing_cell_refinement        'HKL Scalepack (Otwinowski & Minor 1997)'
_computing_data_reduction   'HKL Denzo and Scalepack (Otwinowski & Minor 1997)'
_computing_structure_solution     'SHELXS-97 (Sheldrick, 1997)'
_computing_structure_refinement   'SHELXL-97 (Sheldrick, 1997)'
_computing_molecular_graphics     ?
_computing_publication_material   ?
 
_refine_special_details
;
 Refinement of F^2^ against ALL reflections.  The weighted R-factor wR and
 goodness of fit S are based on F^2^, conventional R-factors R are based
 on F, with F set to zero for negative F^2^. The threshold expression of
 F^2^ > 2sigma(F^2^) is used only for calculating R-factors(gt) etc. and is
 not relevant to the choice of reflections for refinement.  R-factors based
 on F^2^ are statistically about twice as large as those based on F, and R-
 factors based on ALL data will be even larger.
;
 
_refine_ls_structure_factor_coef  Fsqd
_refine_ls_matrix_type            full
_refine_ls_weighting_scheme       calc
_refine_ls_weighting_details
 'calc w=1/[\s^2^(Fo^2^)+(0.0935P)^2^+8.9202P] where P=(Fo^2^+2Fc^2^)/3'
_atom_sites_solution_primary      direct
_atom_sites_solution_secondary    difmap
_atom_sites_solution_hydrogens    geom
_refine_ls_hydrogen_treatment     mixed
_refine_ls_extinction_method      none
_refine_ls_extinction_coef        ?
_refine_ls_number_reflns          4389
_refine_ls_number_parameters      434
_refine_ls_number_restraints      0
_refine_ls_R_factor_all           0.0589
_refine_ls_R_factor_gt            0.0403
_refine_ls_wR_factor_ref          0.1463
_refine_ls_wR_factor_gt           0.1149
_refine_ls_goodness_of_fit_ref    0.984
_refine_ls_restrained_S_all       0.984
_refine_ls_shift/su_max           0.001
_refine_ls_shift/su_mean          0.000
 
loop_
 _atom_site_label
 _atom_site_type_symbol
 _atom_site_fract_x
 _atom_site_fract_y
 _atom_site_fract_z
 _atom_site_U_iso_or_equiv
 _atom_site_adp_type
 _atom_site_occupancy
 _atom_site_symmetry_multiplicity
 _atom_site_calc_flag
 _atom_site_refinement_flags
 _atom_site_disorder_assembly
 _atom_site_disorder_group
C1 C 0.5634(9) 0.4603(9) 1.14546(18) 0.091(3) Uani 1 1 d . . .
H1A H 0.5698 0.5588 1.1559 0.109 Uiso 1 1 calc R . .
H1B H 0.5073 0.4046 1.1591 0.109 Uiso 1 1 calc R . .
C2 C 0.6704(8) 0.3933(12) 1.1505(2) 0.111(4) Uani 1 1 d . . .
H2A H 0.6789 0.3752 1.1753 0.133 Uiso 1 1 calc R . .
H2B H 0.7295 0.4679 1.1449 0.133 Uiso 1 1 calc R . .
C3 C 0.5633(5) 0.3478(6) 1.07826(13) 0.0354(13) Uani 1 1 d . . .
C4 C 0.6466(5) 0.2488(6) 1.08836(14) 0.0397(14) Uani 1 1 d . . .
C5 C 0.6034(5) 0.1927(6) 1.02262(14) 0.0399(14) Uani 1 1 d . . .
C6 C 0.6017(5) 0.1356(6) 0.98946(14) 0.0420(14) Uani 1 1 d . . .
C7 C 0.5615(5) 0.0927(6) 0.92317(14) 0.0407(14) Uani 1 1 d . . .
C8 C 0.6468(5) -0.0060(6) 0.93289(15) 0.0438(15) Uani 1 1 d . . .
C9 C 0.5921(12) 0.0172(10) 0.8546(2) 0.125(4) Uani 1 1 d . . .
H9A H 0.5415 -0.0314 0.8372 0.150 Uiso 1 1 calc R . .
H9B H 0.6383 0.0910 0.8422 0.150 Uiso 1 1 calc R . .
C10 C 0.6681(10) -0.0848(17) 0.8656(2) 0.155(6) Uani 1 1 d . . .
H10A H 0.7399 -0.0626 0.8532 0.186 Uiso 1 1 calc R . .
H10B H 0.6378 -0.1771 0.8555 0.186 Uiso 1 1 calc R . .
C11 C 0.8877(9) 0.8023(10) 1.11540(18) 0.097(3) Uani 1 1 d . . .
H11A H 0.8419 0.8390 1.1346 0.116 Uiso 1 1 calc R . .
H11B H 0.9393 0.7243 1.1247 0.116 Uiso 1 1 calc R . .
C12 C 0.9606(8) 0.9193(15) 1.1050(2) 0.119(4) Uani 1 1 d . . .
H12A H 1.0161 0.9379 1.1243 0.143 Uiso 1 1 calc R . .
H12B H 0.9104 1.0072 1.1030 0.143 Uiso 1 1 calc R . .
C13 C 0.8636(5) 0.7140(7) 1.04675(14) 0.0445(15) Uani 1 1 d . . .
C14 C 0.9622(6) 0.7924(7) 1.04030(15) 0.0510(16) Uani 1 1 d . . .
C15 C 0.9145(5) 0.6441(6) 0.98328(14) 0.0426(14) Uani 1 1 d . . .
C16 C 0.9111(5) 0.5956(6) 0.94944(14) 0.0392(14) Uani 1 1 d . . .
C17 C 0.8431(5) 0.4996(6) 0.88819(14) 0.0408(14) Uani 1 1 d . . .
C18 C 0.9423(5) 0.5797(6) 0.88270(14) 0.0402(14) Uani 1 1 d . . .
C19 C 0.8334(8) 0.4336(10) 0.81793(19) 0.092(3) Uani 1 1 d . . .
H19A H 0.8934 0.3559 0.8173 0.111 Uiso 1 1 calc R . .
H19B H 0.7790 0.4163 0.7984 0.111 Uiso 1 1 calc R . .
C20 C 0.8914(7) 0.5729(11) 0.81203(18) 0.085(3) Uani 1 1 d . . .
H20A H 0.8322 0.6516 0.8119 0.102 Uiso 1 1 calc R . .
H20B H 0.9256 0.5702 0.7891 0.102 Uiso 1 1 calc R . .
C21 C 0.1471(6) -0.1393(8) 0.78240(19) 0.072(2) Uani 1 1 d . . .
H21A H 0.0743 -0.1952 0.7825 0.107 Uiso 1 1 calc R . .
H21B H 0.1587 -0.0895 0.8044 0.107 Uiso 1 1 calc R . .
H21C H 0.2123 -0.2060 0.7786 0.107 Uiso 1 1 calc R . .
C22 C 0.1408(5) -0.0248(7) 0.75359(16) 0.0497(16) Uani 1 1 d . . .
H22A H 0.0732 0.0399 0.7574 0.060 Uiso 1 1 calc R . .
H22B H 0.1261 -0.0766 0.7317 0.060 Uiso 1 1 calc R . .
C23 C 0.2280(5) 0.1678(7) 0.71784(15) 0.0491(15) Uani 1 1 d . . .
H23A H 0.1531 0.2197 0.7203 0.059 Uiso 1 1 calc R . .
H23B H 0.2196 0.1022 0.6978 0.059 Uiso 1 1 calc R . .
C24 C 0.3226(7) 0.2825(8) 0.71030(19) 0.071(2) Uani 1 1 d . . .
H24A H 0.3005 0.3368 0.6896 0.107 Uiso 1 1 calc R . .
H24B H 0.3971 0.2328 0.7070 0.107 Uiso 1 1 calc R . .
H24C H 0.3304 0.3506 0.7295 0.107 Uiso 1 1 calc R . .
C25 C 0.6502(5) -0.1286(7) 0.77049(15) 0.0425(15) Uani 1 1 d . . .
C26 C 0.8516(5) 0.0311(7) 0.79237(17) 0.0462(15) Uani 1 1 d . . .
C27 C 0.8554(5) 0.1785(7) 0.73075(16) 0.0451(15) Uani 1 1 d . . .
N1 N 0.2500 0.0720(7) 0.7500 0.0372(16) Uani 1 2 d S . .
N2 N 0.5930(5) -0.2185(6) 0.78280(15) 0.0640(16) Uani 1 1 d . . .
N3 N 0.9124(5) 0.0377(7) 0.81696(15) 0.0714(17) Uani 1 1 d . . .
N4 N 0.9187(5) 0.2656(6) 0.71947(16) 0.0674(17) Uani 1 1 d . . .
O1 O 0.0601(5) 0.5328(6) 0.72991(14) 0.0862(16) Uani 1 1 d . . .
S1 S 0.49524(15) 0.48543(19) 1.10314(4) 0.0538(5) Uani 1 1 d . . .
S2 S 0.71496(16) 0.2262(2) 1.12984(4) 0.0620(5) Uani 1 1 d . . .
S3 S 0.51168(14) 0.34122(17) 1.03464(4) 0.0473(4) Uani 1 1 d . . .
S4 S 0.69717(14) 0.12593(18) 1.05617(4) 0.0488(4) Uani 1 1 d . . .
S5 S 0.50773(15) 0.20665(18) 0.95639(4) 0.0496(4) Uani 1 1 d . . .
S6 S 0.69553(14) -0.00706(18) 0.97703(4) 0.0505(4) Uani 1 1 d . . .
S7 S 0.49620(16) 0.11950(19) 0.88154(4) 0.0560(5) Uani 1 1 d . . .
S8 S 0.71848(17) -0.1360(2) 0.90654(5) 0.0686(6) Uani 1 1 d . . .
S9 S 0.78429(16) 0.7138(2) 1.08513(4) 0.0639(5) Uani 1 1 d . . .
S10 S 1.0428(2) 0.9132(3) 1.06808(5) 0.0861(7) Uani 1 1 d . . .
S11 S 0.81030(14) 0.59273(19) 1.01382(4) 0.0514(4) Uani 1 1 d . . .
S12 S 1.02534(14) 0.76444(19) 0.99962(4) 0.0520(5) Uani 1 1 d . . .
S13 S 0.80171(13) 0.47722(19) 0.93188(4) 0.0490(4) Uani 1 1 d . . .
S14 S 1.01643(13) 0.65229(17) 0.91979(4) 0.0449(4) Uani 1 1 d . . .
S15 S 0.75232(15) 0.4074(2) 0.85666(4) 0.0668(6) Uani 1 1 d . . .
S16 S 1.00556(17) 0.6201(3) 0.84302(4) 0.0767(7) Uani 1 1 d . . .
Fe1 Fe 0.7500 0.02639(12) 0.7500 0.0371(3) Uani 1 2 d S . .
 
loop_
 _atom_site_aniso_label
 _atom_site_aniso_U_11
 _atom_site_aniso_U_22
 _atom_site_aniso_U_33
 _atom_site_aniso_U_23
 _atom_site_aniso_U_13
 _atom_site_aniso_U_12
C1 0.149(9) 0.082(6) 0.041(4) -0.012(4) -0.029(5) 0.040(6)
C2 0.099(7) 0.165(9) 0.065(5) -0.058(6) -0.039(5) 0.069(7)
C3 0.036(3) 0.039(3) 0.032(3) -0.001(3) -0.001(2) -0.005(3)
C4 0.038(3) 0.045(3) 0.036(3) -0.002(3) -0.003(3) 0.000(3)
C5 0.038(3) 0.048(3) 0.034(3) -0.001(3) 0.001(3) -0.001(3)
C6 0.043(4) 0.048(4) 0.035(4) 0.002(3) 0.004(3) 0.005(3)
C7 0.050(4) 0.039(3) 0.034(3) -0.005(3) 0.005(3) -0.002(3)
C8 0.044(4) 0.048(4) 0.040(4) -0.006(3) 0.005(3) 0.004(3)
C9 0.248(14) 0.086(6) 0.043(5) 0.001(4) 0.037(7) 0.078(8)
C10 0.153(10) 0.276(16) 0.037(5) -0.023(7) 0.001(5) 0.130(11)
C11 0.157(9) 0.097(6) 0.037(4) -0.001(4) 0.015(5) -0.029(6)
C12 0.099(7) 0.213(12) 0.046(5) -0.032(6) 0.008(5) -0.038(8)
C13 0.048(4) 0.050(4) 0.036(3) 0.003(3) 0.006(3) 0.003(3)
C14 0.063(4) 0.053(4) 0.038(4) -0.002(3) 0.013(3) -0.008(3)
C15 0.042(4) 0.050(4) 0.035(4) 0.000(3) 0.002(3) 0.003(3)
C16 0.041(3) 0.042(3) 0.034(3) 0.000(3) -0.001(3) -0.002(3)
C17 0.041(4) 0.045(3) 0.036(3) -0.009(3) 0.001(3) -0.002(3)
C18 0.044(4) 0.045(3) 0.032(3) -0.001(3) 0.000(3) -0.009(3)
C19 0.107(7) 0.120(7) 0.050(5) -0.020(5) 0.007(4) -0.058(6)
C20 0.075(6) 0.135(8) 0.044(4) -0.001(5) -0.003(4) -0.026(5)
C21 0.066(5) 0.072(5) 0.077(5) 0.024(4) 0.000(4) -0.015(4)
C22 0.034(3) 0.060(4) 0.054(4) 0.005(3) -0.004(3) -0.002(3)
C23 0.056(4) 0.051(4) 0.040(3) 0.006(3) 0.001(3) 0.002(3)
C24 0.087(5) 0.065(5) 0.063(5) 0.012(4) 0.015(4) -0.012(4)
C25 0.045(4) 0.045(4) 0.037(3) -0.004(3) -0.008(3) 0.004(3)
C26 0.045(4) 0.048(4) 0.045(4) -0.007(3) 0.002(3) 0.002(3)
C27 0.039(4) 0.042(4) 0.053(4) 0.001(3) -0.011(3) 0.007(3)
N1 0.033(4) 0.045(4) 0.034(4) 0.000 -0.001(3) 0.000
N2 0.072(4) 0.056(4) 0.064(4) 0.010(3) 0.008(3) -0.014(3)
N3 0.068(4) 0.100(5) 0.045(4) -0.015(3) -0.019(3) 0.007(3)
N4 0.054(4) 0.053(4) 0.095(5) 0.021(3) -0.004(3) -0.006(3)
O1 0.092(4) 0.075(3) 0.091(4) 0.007(3) -0.005(3) 0.011(3)
S1 0.0572(11) 0.0594(11) 0.0443(10) -0.0166(8) -0.0081(8) 0.0150(8)
S2 0.0717(12) 0.0690(12) 0.0439(10) -0.0088(9) -0.0245(8) 0.0150(9)
S3 0.0597(10) 0.0495(10) 0.0321(8) -0.0012(7) -0.0059(7) 0.0162(8)
S4 0.0470(10) 0.0600(10) 0.0392(9) -0.0047(7) -0.0064(7) 0.0147(8)
S5 0.0645(11) 0.0531(10) 0.0309(8) -0.0037(7) -0.0013(7) 0.0208(8)
S6 0.0489(10) 0.0616(11) 0.0410(9) -0.0065(8) 0.0011(7) 0.0164(8)
S7 0.0770(12) 0.0580(11) 0.0328(9) -0.0066(7) -0.0031(8) 0.0059(9)
S8 0.0775(13) 0.0692(12) 0.0593(11) -0.0235(9) 0.0069(9) 0.0216(10)
S9 0.0632(12) 0.0837(13) 0.0459(10) 0.0020(9) 0.0236(8) 0.0016(10)
S10 0.1165(18) 0.0912(15) 0.0516(11) -0.0288(11) 0.0211(11) -0.0466(13)
S11 0.0415(10) 0.0701(11) 0.0427(9) -0.0022(8) 0.0054(7) -0.0092(8)
S12 0.0570(11) 0.0643(11) 0.0350(9) -0.0070(8) 0.0097(7) -0.0203(8)
S13 0.0415(9) 0.0662(11) 0.0395(9) -0.0015(8) 0.0025(7) -0.0132(8)
S14 0.0441(9) 0.0562(10) 0.0344(9) -0.0037(7) 0.0011(7) -0.0136(7)
S15 0.0546(11) 0.0958(14) 0.0503(10) -0.0275(10) 0.0089(8) -0.0330(10)
S16 0.0694(13) 0.1257(18) 0.0350(9) -0.0011(10) 0.0026(8) -0.0462(12)
Fe1 0.0377(7) 0.0385(7) 0.0347(7) 0.000 -0.0056(5) 0.000
 
_geom_special_details
;
 All esds (except the esd in the dihedral angle between two l.s. planes)
 are estimated using the full covariance matrix.  The cell esds are taken
 into account individually in the estimation of esds in distances, angles
 and torsion angles; correlations between esds in cell parameters are only
 used when they are defined by crystal symmetry.  An approximate (isotropic)
 treatment of cell esds is used for estimating esds involving l.s. planes.
;
 
loop_
 _geom_bond_atom_site_label_1
 _geom_bond_atom_site_label_2
 _geom_bond_distance
 _geom_bond_site_symmetry_2
 _geom_bond_publ_flag
C1 C2 1.355(10) . ?
C1 S1 1.795(7) . ?
C2 S2 1.770(8) . ?
C3 C4 1.340(8) . ?
C3 S1 1.748(6) . ?
C3 S3 1.761(5) . ?
C4 S4 1.760(6) . ?
C4 S2 1.764(6) . ?
C5 C6 1.373(8) . ?
C5 S3 1.751(6) . ?
C5 S4 1.751(6) . ?
C6 S6 1.731(6) . ?
C6 S5 1.752(6) . ?
C7 C8 1.350(8) . ?
C7 S7 1.760(6) . ?
C7 S5 1.753(6) . ?
C8 S8 1.752(6) . ?
C8 S6 1.770(6) . ?
C9 C10 1.313(12) . ?
C9 S7 1.771(8) . ?
C10 S8 1.721(9) . ?
C11 C12 1.394(12) . ?
C11 S9 1.807(9) . ?
C12 S10 1.716(8) . ?
C13 C14 1.342(8) . ?
C13 S9 1.744(6) . ?
C13 S11 1.760(6) . ?
C14 S12 1.752(6) . ?
C14 S10 1.755(6) . ?
C15 C16 1.371(8) . ?
C15 S11 1.742(6) . ?
C15 S12 1.752(6) . ?
C16 S14 1.741(6) . ?
C16 S13 1.747(6) . ?
C17 C18 1.348(8) . ?
C17 S13 1.765(6) . ?
C17 S15 1.770(6) . ?
C18 S16 1.738(6) . ?
C18 S14 1.758(6) . ?
C19 C20 1.427(11) . ?
C19 S15 1.781(7) . ?
C20 S16 1.781(7) . ?
C21 C22 1.508(9) . ?
C22 N1 1.513(7) . ?
C23 N1 1.519(7) . ?
C23 C24 1.512(9) . ?
C25 N2 1.140(7) . ?
C25 Fe1 1.962(7) . ?
C26 N3 1.154(8) . ?
C26 Fe1 1.967(7) . ?
C27 N4 1.148(7) . ?
C27 Fe1 1.962(7) . ?
N1 C23 1.519(7) 2_556 ?
N1 C22 1.513(7) 2_556 ?
Fe1 C27 1.962(7) 2_656 ?
Fe1 C25 1.962(7) 2_656 ?
Fe1 C26 1.967(7) 2_656 ?
 
loop_
 _geom_angle_atom_site_label_1
 _geom_angle_atom_site_label_2
 _geom_angle_atom_site_label_3
 _geom_angle
 _geom_angle_site_symmetry_1
 _geom_angle_site_symmetry_3
 _geom_angle_publ_flag
C2 C1 S1 122.8(6) . . ?
C1 C2 S2 124.8(7) . . ?
C4 C3 S1 128.3(4) . . ?
C4 C3 S3 117.7(4) . . ?
S1 C3 S3 113.9(3) . . ?
C3 C4 S4 116.4(4) . . ?
C3 C4 S2 128.6(4) . . ?
S4 C4 S2 115.0(3) . . ?
C6 C5 S3 122.2(4) . . ?
C6 C5 S4 123.4(4) . . ?
S3 C5 S4 114.4(3) . . ?
C5 C6 S6 122.4(4) . . ?
C5 C6 S5 122.2(4) . . ?
S6 C6 S5 115.4(3) . . ?
C8 C7 S7 128.2(4) . . ?
C8 C7 S5 115.8(4) . . ?
S7 C7 S5 116.1(3) . . ?
C7 C8 S8 127.5(5) . . ?
C7 C8 S6 118.0(4) . . ?
S8 C8 S6 114.5(3) . . ?
C10 C9 S7 124.8(7) . . ?
C9 C10 S8 132.6(7) . . ?
C12 C11 S9 121.3(6) . . ?
C11 C12 S10 123.1(8) . . ?
C14 C13 S9 126.9(5) . . ?
C14 C13 S11 117.2(4) . . ?
S9 C13 S11 115.8(3) . . ?
C13 C14 S12 116.5(5) . . ?
C13 C14 S10 128.8(5) . . ?
S12 C14 S10 114.6(3) . . ?
C16 C15 S11 123.6(5) . . ?
C16 C15 S12 122.4(4) . . ?
S11 C15 S12 114.0(3) . . ?
C15 C16 S14 121.7(4) . . ?
C15 C16 S13 124.1(4) . . ?
S14 C16 S13 114.2(3) . . ?
C18 C17 S13 116.7(4) . . ?
C18 C17 S15 127.4(4) . . ?
S13 C17 S15 115.9(3) . . ?
C17 C18 S16 127.4(4) . . ?
C17 C18 S14 116.6(4) . . ?
S16 C18 S14 116.0(3) . . ?
C20 C19 S15 119.6(6) . . ?
C19 C20 S16 115.2(6) . . ?
C21 C22 N1 115.6(5) . . ?
N1 C23 C24 116.0(5) . . ?
N2 C25 Fe1 179.1(6) . . ?
N3 C26 Fe1 178.1(6) . . ?
N4 C27 Fe1 178.8(6) . . ?
C23 N1 C23 111.3(6) 2_556 . ?
C23 N1 C22 106.3(3) 2_556 2_556 ?
C23 N1 C22 111.4(3) . 2_556 ?
C23 N1 C22 111.4(3) 2_556 . ?
C23 N1 C22 106.3(3) . . ?
C22 N1 C22 110.2(6) 2_556 . ?
C3 S1 C1 102.9(3) . . ?
C4 S2 C2 100.7(3) . . ?
C5 S3 C3 95.4(3) . . ?
C5 S4 C4 96.0(3) . . ?
C6 S5 C7 96.0(3) . . ?
C6 S6 C8 94.8(3) . . ?
C7 S7 C9 102.4(4) . . ?
C10 S8 C8 101.9(4) . . ?
C13 S9 C11 102.1(4) . . ?
C12 S10 C14 104.0(4) . . ?
C15 S11 C13 95.7(3) . . ?
C14 S12 C15 96.1(3) . . ?
C16 S13 C17 95.6(3) . . ?
C16 S14 C18 96.1(3) . . ?
C17 S15 C19 102.2(3) . . ?
C18 S16 C20 103.4(3) . . ?
C27 Fe1 C27 92.3(3) . 2_656 ?
C27 Fe1 C25 88.9(2) . 2_656 ?
C27 Fe1 C25 177.6(2) 2_656 2_656 ?
C27 Fe1 C25 177.6(2) . . ?
C27 Fe1 C25 88.9(2) 2_656 . ?
C25 Fe1 C25 90.1(3) 2_656 . ?
C27 Fe1 C26 87.3(2) . . ?
C27 Fe1 C26 91.0(2) 2_656 . ?
C25 Fe1 C26 91.2(2) 2_656 . ?
C25 Fe1 C26 90.6(2) . . ?
C27 Fe1 C26 91.0(2) . 2_656 ?
C27 Fe1 C26 87.3(2) 2_656 2_656 ?
C25 Fe1 C26 90.6(2) 2_656 2_656 ?
C25 Fe1 C26 91.2(2) . 2_656 ?
C26 Fe1 C26 177.5(4) . 2_656 ?
 
_diffrn_measured_fraction_theta_max    0.982
_diffrn_reflns_theta_full              21.54
_diffrn_measured_fraction_theta_full   0.982
_refine_diff_density_max    0.528
_refine_diff_density_min   -0.460
_refine_diff_density_rms    0.122 

data_2-200K
 
_audit_creation_method            SHELXL-97
_chemical_name_systematic
;
 ?
;
_chemical_name_common             ?
_chemical_melting_point           ?
_chemical_formula_moiety          ?
_chemical_formula_sum
 'C54 H56 Fe N7 O2 S32'
_chemical_formula_weight          1916.83
 
loop_
 _atom_type_symbol
 _atom_type_description
 _atom_type_scat_dispersion_real
 _atom_type_scat_dispersion_imag
 _atom_type_scat_source
 'C'  'C'   0.0033   0.0016
 'International Tables Vol C Tables 4.2.6.8 and 6.1.1.4'
 'H'  'H'   0.0000   0.0000
 'International Tables Vol C Tables 4.2.6.8 and 6.1.1.4'
 'N'  'N'   0.0061   0.0033
 'International Tables Vol C Tables 4.2.6.8 and 6.1.1.4'
 'O'  'O'   0.0106   0.0060
 'International Tables Vol C Tables 4.2.6.8 and 6.1.1.4'
 'S'  'S'   0.1246   0.1234
 'International Tables Vol C Tables 4.2.6.8 and 6.1.1.4'
 'Fe'  'Fe'   0.3463   0.8444
 'International Tables Vol C Tables 4.2.6.8 and 6.1.1.4'
 
_symmetry_cell_setting            ?
_symmetry_space_group_name_H-M    ?
 
loop_
 _symmetry_equiv_pos_as_xyz
 'x, y, z'
 '-x+1/2, y, -z+1/2'
 '-x, -y, -z'
 'x-1/2, -y, z-1/2'
 
_cell_length_a                    11.2203(3)
_cell_length_b                    8.8587(3)
_cell_length_c                    38.0541(11)
_cell_angle_alpha                 90.00
_cell_angle_beta                  91.860(9)
_cell_angle_gamma                 90.00
_cell_volume                      3780.5(2)
_cell_formula_units_Z             2
_cell_measurement_temperature     200
_cell_measurement_reflns_used     ?
_cell_measurement_theta_min       ?
_cell_measurement_theta_max       ?
 
_exptl_crystal_description        ?
_exptl_crystal_colour             ?
_exptl_crystal_size_max           ?
_exptl_crystal_size_mid           ?
_exptl_crystal_size_min           ?
_exptl_crystal_density_meas       ?
_exptl_crystal_density_diffrn     1.684
_exptl_crystal_density_method     'not measured'
_exptl_crystal_F_000              1966
_exptl_absorpt_coefficient_mu     1.131
_exptl_absorpt_correction_type    ?
_exptl_absorpt_correction_T_min   ?
_exptl_absorpt_correction_T_max   ?
_exptl_absorpt_process_details    ?
 
_exptl_special_details
;
 ?
;
 
_diffrn_ambient_temperature       200
_diffrn_radiation_wavelength      0.71073
_diffrn_radiation_type            MoK\a
_diffrn_radiation_source          'fine-focus sealed tube'
_diffrn_radiation_monochromator   graphite
_diffrn_measurement_device_type   ?
_diffrn_measurement_method        ?
_diffrn_detector_area_resol_mean  ?
_diffrn_standards_number          ?
_diffrn_standards_interval_count  ?
_diffrn_standards_interval_time   ?
_diffrn_standards_decay_%         ?
_diffrn_reflns_number             25879
_diffrn_reflns_av_R_equivalents   0.0374
_diffrn_reflns_av_sigmaI/netI     0.0303
_diffrn_reflns_limit_h_min        -12
_diffrn_reflns_limit_h_max        12
_diffrn_reflns_limit_k_min        -9
_diffrn_reflns_limit_k_max        9
_diffrn_reflns_limit_l_min        -42
_diffrn_reflns_limit_l_max        42
_diffrn_reflns_theta_min          1.07
_diffrn_reflns_theta_max          23.54
_reflns_number_total              5576
_reflns_number_gt                 4490
_reflns_threshold_expression      >2sigma(I)
 
_computing_data_collection        'Collect  (Nonius BV, 1997-2000)'
_computing_cell_refinement        'HKL Scalepack (Otwinowski & Minor 1997)'
_computing_data_reduction   'HKL Denzo and Scalepack (Otwinowski & Minor 1997)'
_computing_structure_solution     'SHELXS-97 (Sheldrick, 1997)'
_computing_structure_refinement   'SHELXL-97 (Sheldrick, 1997)'
_computing_molecular_graphics     ?
_computing_publication_material   ?
 
_refine_special_details
;
 Refinement of F^2^ against ALL reflections.  The weighted R-factor wR and
 goodness of fit S are based on F^2^, conventional R-factors R are based
 on F, with F set to zero for negative F^2^. The threshold expression of
 F^2^ > 2sigma(F^2^) is used only for calculating R-factors(gt) etc. and is
 not relevant to the choice of reflections for refinement.  R-factors based
 on F^2^ are statistically about twice as large as those based on F, and R-
 factors based on ALL data will be even larger.
;
 
_refine_ls_structure_factor_coef  Fsqd
_refine_ls_matrix_type            full
_refine_ls_weighting_scheme       calc
_refine_ls_weighting_details
 'calc w=1/[\s^2^(Fo^2^)+(0.0855P)^2^+10.9826P] where P=(Fo^2^+2Fc^2^)/3'
_atom_sites_solution_primary      direct
_atom_sites_solution_secondary    difmap
_atom_sites_solution_hydrogens    geom
_refine_ls_hydrogen_treatment     mixed
_refine_ls_extinction_method      none
_refine_ls_extinction_coef        ?
_refine_ls_number_reflns          5576
_refine_ls_number_parameters      434
_refine_ls_number_restraints      0
_refine_ls_R_factor_all           0.0592
_refine_ls_R_factor_gt            0.0412
_refine_ls_wR_factor_ref          0.1402
_refine_ls_wR_factor_gt           0.1124
_refine_ls_goodness_of_fit_ref    0.975
_refine_ls_restrained_S_all       0.975
_refine_ls_shift/su_max           0.002
_refine_ls_shift/su_mean          0.000
 
loop_
 _atom_site_label
 _atom_site_type_symbol
 _atom_site_fract_x
 _atom_site_fract_y
 _atom_site_fract_z
 _atom_site_U_iso_or_equiv
 _atom_site_adp_type
 _atom_site_occupancy
 _atom_site_symmetry_multiplicity
 _atom_site_calc_flag
 _atom_site_refinement_flags
 _atom_site_disorder_assembly
 _atom_site_disorder_group
C1 C 0.5548(6) 0.4593(7) 1.14675(14) 0.0503(16) Uani 1 1 d . . .
H1A H 0.5483 0.5527 1.1598 0.060 Uiso 1 1 calc R . .
H1B H 0.5048 0.3853 1.1580 0.060 Uiso 1 1 calc R . .
C2 C 0.6765(5) 0.4083(7) 1.15009(15) 0.0498(16) Uani 1 1 d . . .
H2A H 0.6986 0.4049 1.1749 0.060 Uiso 1 1 calc R . .
H2B H 0.7266 0.4837 1.1394 0.060 Uiso 1 1 calc R . .
C3 C 0.5618(4) 0.3497(5) 1.07876(11) 0.0235(10) Uani 1 1 d . . .
C4 C 0.6451(4) 0.2486(5) 1.08900(12) 0.0263(11) Uani 1 1 d . . .
C5 C 0.6023(4) 0.1924(5) 1.02320(12) 0.0247(10) Uani 1 1 d . . .
C6 C 0.6009(4) 0.1340(5) 0.98979(12) 0.0262(11) Uani 1 1 d . . .
C7 C 0.5613(4) 0.0902(5) 0.92291(12) 0.0272(11) Uani 1 1 d . . .
C8 C 0.6459(4) -0.0105(6) 0.93274(12) 0.0303(11) Uani 1 1 d . . .
C9 C 0.5854(9) 0.0089(9) 0.85393(17) 0.096(3) Uani 1 1 d . . .
H9A H 0.5313 -0.0530 0.8397 0.115 Uiso 1 1 calc R . .
H9B H 0.6216 0.0794 0.8379 0.115 Uiso 1 1 calc R . .
C10 C 0.6718(9) -0.0817(16) 0.86515(18) 0.156(6) Uani 1 1 d . . .
H10A H 0.7432 -0.0380 0.8557 0.188 Uiso 1 1 calc R . .
H10B H 0.6578 -0.1742 0.8520 0.188 Uiso 1 1 calc R . .
C11 C 0.8934(7) 0.8021(7) 1.11682(15) 0.0596(18) Uani 1 1 d . . .
H11A H 0.8523 0.8279 1.1380 0.072 Uiso 1 1 calc R . .
H11B H 0.9531 0.7269 1.1232 0.072 Uiso 1 1 calc R . .
C12 C 0.9565(6) 0.9396(8) 1.10473(15) 0.0565(17) Uani 1 1 d . . .
H12A H 1.0048 0.9786 1.1243 0.068 Uiso 1 1 calc R . .
H12B H 0.8972 1.0156 1.0986 0.068 Uiso 1 1 calc R . .
C13 C 0.8661(4) 0.7149(6) 1.04765(12) 0.0306(11) Uani 1 1 d . . .
C14 C 0.9654(5) 0.7934(6) 1.04112(12) 0.0340(12) Uani 1 1 d . . .
C15 C 0.9158(4) 0.6432(5) 0.98395(12) 0.0274(11) Uani 1 1 d . . .
C16 C 0.9123(4) 0.5943(5) 0.94977(12) 0.0266(11) Uani 1 1 d . . .
C17 C 0.8436(4) 0.4951(5) 0.88849(12) 0.0276(11) Uani 1 1 d . . .
C18 C 0.9428(4) 0.5769(6) 0.88288(12) 0.0286(11) Uani 1 1 d . . .
C19 C 0.8371(6) 0.4219(8) 0.81783(15) 0.0569(18) Uani 1 1 d . . .
H19A H 0.9011 0.3482 0.8189 0.068 Uiso 1 1 calc R . .
H19B H 0.7858 0.3966 0.7977 0.068 Uiso 1 1 calc R . .
C20 C 0.8899(5) 0.5716(8) 0.81160(14) 0.0524(16) Uani 1 1 d . . .
H20A H 0.8277 0.6474 0.8124 0.063 Uiso 1 1 calc R . .
H20B H 0.9216 0.5734 0.7882 0.063 Uiso 1 1 calc R . .
C21 C 0.1439(5) -0.1464(6) 0.78151(15) 0.0439(14) Uani 1 1 d . . .
H21A H 0.0706 -0.2023 0.7811 0.066 Uiso 1 1 calc R . .
H21B H 0.1548 -0.0970 0.8038 0.066 Uiso 1 1 calc R . .
H21C H 0.2093 -0.2141 0.7780 0.066 Uiso 1 1 calc R . .
C22 C 0.1394(4) -0.0298(6) 0.75263(13) 0.0324(12) Uani 1 1 d . . .
H22A H 0.0715 0.0355 0.7562 0.039 Uiso 1 1 calc R . .
H22B H 0.1259 -0.0813 0.7304 0.039 Uiso 1 1 calc R . .
C23 C 0.2310(5) 0.1655(6) 0.71725(13) 0.0346(12) Uani 1 1 d . . .
H23A H 0.1553 0.2174 0.7189 0.042 Uiso 1 1 calc R . .
H23B H 0.2252 0.0996 0.6969 0.042 Uiso 1 1 calc R . .
C24 C 0.3266(5) 0.2820(7) 0.71095(16) 0.0498(15) Uani 1 1 d . . .
H24A H 0.3068 0.3370 0.6898 0.075 Uiso 1 1 calc R . .
H24B H 0.4019 0.2323 0.7086 0.075 Uiso 1 1 calc R . .
H24C H 0.3317 0.3505 0.7305 0.075 Uiso 1 1 calc R . .
C25 C 0.6515(4) -0.1328(6) 0.77062(12) 0.0301(11) Uani 1 1 d . . .
C26 C 0.8528(5) 0.0275(6) 0.79247(14) 0.0349(12) Uani 1 1 d . . .
C27 C 0.8552(5) 0.1757(6) 0.73049(13) 0.0339(12) Uani 1 1 d . . .
N1 N 0.2500 0.0681(6) 0.7500 0.0260(12) Uani 1 2 d S . .
N2 N 0.5937(4) -0.2255(5) 0.78325(12) 0.0426(11) Uani 1 1 d . . .
N3 N 0.9155(5) 0.0349(6) 0.81703(13) 0.0535(14) Uani 1 1 d . . .
N4 N 0.9201(4) 0.2619(6) 0.71908(13) 0.0476(12) Uani 1 1 d . . .
O1 O 0.0641(4) 0.5319(5) 0.73002(12) 0.0686(13) Uani 1 1 d . . .
S1 S 0.49471(11) 0.49120(15) 1.10312(3) 0.0341(3) Uani 1 1 d . . .
S2 S 0.71189(12) 0.22586(16) 1.13105(3) 0.0402(4) Uani 1 1 d . . .
S3 S 0.51104(11) 0.34288(14) 1.03462(3) 0.0300(3) Uani 1 1 d . . .
S4 S 0.69578(11) 0.12361(15) 1.05687(3) 0.0309(3) Uani 1 1 d . . .
S5 S 0.50714(11) 0.20641(14) 0.95637(3) 0.0317(3) Uani 1 1 d . . .
S6 S 0.69511(11) -0.01113(15) 0.97720(3) 0.0320(3) Uani 1 1 d . . .
S7 S 0.49464(13) 0.11852(15) 0.88124(3) 0.0359(3) Uani 1 1 d . . .
S8 S 0.71672(14) -0.14224(17) 0.90632(4) 0.0457(4) Uani 1 1 d . . .
S9 S 0.78616(12) 0.71556(17) 1.08628(3) 0.0412(4) Uani 1 1 d . . .
S10 S 1.04875(15) 0.91491(19) 1.06864(4) 0.0530(4) Uani 1 1 d . . .
S11 S 0.81061(11) 0.59296(16) 1.01457(3) 0.0331(3) Uani 1 1 d . . .
S12 S 1.02767(11) 0.76518(15) 0.99989(3) 0.0333(3) Uani 1 1 d . . .
S13 S 0.80217(11) 0.47386(15) 0.93233(3) 0.0314(3) Uani 1 1 d . . .
S14 S 1.01825(11) 0.65059(14) 0.92004(3) 0.0292(3) Uani 1 1 d . . .
S15 S 0.75193(12) 0.40237(19) 0.85680(4) 0.0448(4) Uani 1 1 d . . .
S16 S 1.00669(13) 0.6200(2) 0.84288(3) 0.0509(4) Uani 1 1 d . . .
Fe1 Fe 0.7500 0.02271(11) 0.7500 0.0268(3) Uani 1 2 d S . .
 
loop_
 _atom_site_aniso_label
 _atom_site_aniso_U_11
 _atom_site_aniso_U_22
 _atom_site_aniso_U_33
 _atom_site_aniso_U_23
 _atom_site_aniso_U_13
 _atom_site_aniso_U_12
C1 0.077(4) 0.044(4) 0.029(3) -0.001(3) -0.007(3) 0.020(3)
C2 0.046(4) 0.066(4) 0.036(3) -0.015(3) -0.011(3) 0.010(3)
C3 0.024(2) 0.025(3) 0.021(2) -0.0013(19) -0.0010(19) 0.000(2)
C4 0.025(2) 0.030(3) 0.023(2) -0.006(2) -0.0002(19) -0.001(2)
C5 0.027(2) 0.024(3) 0.023(2) 0.001(2) -0.0001(19) -0.001(2)
C6 0.026(3) 0.027(3) 0.026(3) 0.000(2) 0.0035(19) 0.003(2)
C7 0.037(3) 0.023(3) 0.022(2) -0.004(2) 0.005(2) 0.000(2)
C8 0.032(3) 0.033(3) 0.026(3) -0.005(2) 0.003(2) 0.000(2)
C9 0.183(9) 0.079(5) 0.029(3) -0.003(3) 0.027(5) 0.077(6)
C10 0.139(8) 0.304(16) 0.025(4) -0.029(6) -0.004(4) 0.159(10)
C11 0.096(5) 0.056(4) 0.028(3) 0.002(3) 0.008(3) -0.008(4)
C12 0.055(4) 0.086(5) 0.029(3) -0.010(3) 0.003(3) -0.003(4)
C13 0.031(3) 0.037(3) 0.025(2) 0.001(2) 0.006(2) 0.005(2)
C14 0.041(3) 0.033(3) 0.028(3) -0.002(2) 0.008(2) -0.005(2)
C15 0.029(3) 0.029(3) 0.024(3) 0.002(2) 0.003(2) 0.003(2)
C16 0.026(3) 0.027(3) 0.027(3) 0.003(2) -0.001(2) -0.001(2)
C17 0.029(3) 0.029(3) 0.025(3) -0.005(2) 0.001(2) -0.004(2)
C18 0.030(3) 0.030(3) 0.025(3) -0.002(2) -0.001(2) -0.004(2)
C19 0.061(4) 0.071(5) 0.038(3) -0.015(3) 0.005(3) -0.029(4)
C20 0.046(4) 0.082(5) 0.029(3) 0.000(3) -0.001(3) -0.011(3)
C21 0.042(3) 0.043(3) 0.047(3) 0.013(3) -0.001(3) -0.011(3)
C22 0.027(3) 0.037(3) 0.033(3) 0.004(2) -0.002(2) -0.004(2)
C23 0.041(3) 0.030(3) 0.032(3) 0.006(2) 0.006(2) 0.005(2)
C24 0.059(4) 0.046(4) 0.045(3) 0.012(3) 0.013(3) -0.007(3)
C25 0.034(3) 0.029(3) 0.027(3) -0.002(2) -0.005(2) 0.005(2)
C26 0.037(3) 0.035(3) 0.033(3) -0.006(2) 0.001(2) 0.000(2)
C27 0.034(3) 0.033(3) 0.034(3) 0.000(2) -0.010(2) 0.008(3)
N1 0.026(3) 0.030(3) 0.022(3) 0.000 0.001(2) 0.000
N2 0.048(3) 0.039(3) 0.040(3) 0.006(2) 0.002(2) -0.005(2)
N3 0.053(3) 0.069(4) 0.037(3) -0.009(3) -0.016(3) 0.008(3)
N4 0.037(3) 0.043(3) 0.063(3) 0.017(3) -0.004(2) -0.001(2)
O1 0.074(3) 0.067(3) 0.065(3) 0.005(2) -0.003(2) 0.004(3)
S1 0.0360(7) 0.0354(7) 0.0303(7) -0.0104(6) -0.0063(5) 0.0100(6)
S2 0.0467(8) 0.0423(8) 0.0303(7) -0.0053(6) -0.0169(6) 0.0115(6)
S3 0.0380(7) 0.0301(7) 0.0216(6) -0.0004(5) -0.0027(5) 0.0106(6)
S4 0.0302(7) 0.0357(7) 0.0266(6) -0.0037(5) -0.0037(5) 0.0106(6)
S5 0.0409(7) 0.0336(7) 0.0204(6) -0.0021(5) -0.0004(5) 0.0128(6)
S6 0.0310(7) 0.0376(7) 0.0272(7) -0.0041(5) 0.0011(5) 0.0099(6)
S7 0.0507(8) 0.0349(7) 0.0218(6) -0.0036(5) -0.0022(6) 0.0031(6)
S8 0.0557(9) 0.0429(9) 0.0388(8) -0.0138(6) 0.0071(7) 0.0150(7)
S9 0.0421(8) 0.0499(9) 0.0328(7) 0.0030(6) 0.0165(6) 0.0020(7)
S10 0.0693(11) 0.0554(10) 0.0350(8) -0.0180(7) 0.0134(7) -0.0241(8)
S11 0.0245(7) 0.0450(8) 0.0300(7) -0.0003(6) 0.0044(5) -0.0054(6)
S12 0.0368(7) 0.0397(8) 0.0239(6) -0.0038(5) 0.0077(5) -0.0130(6)
S13 0.0260(6) 0.0412(8) 0.0272(6) 0.0003(5) 0.0017(5) -0.0084(6)
S14 0.0282(7) 0.0359(7) 0.0236(6) -0.0017(5) 0.0009(5) -0.0086(5)
S15 0.0335(7) 0.0677(10) 0.0335(7) -0.0173(7) 0.0065(6) -0.0225(7)
S16 0.0415(8) 0.0876(12) 0.0236(7) -0.0007(7) 0.0020(6) -0.0291(8)
Fe1 0.0291(5) 0.0275(5) 0.0234(5) 0.000 -0.0040(4) 0.000
 
_geom_special_details
;
 All esds (except the esd in the dihedral angle between two l.s. planes)
 are estimated using the full covariance matrix.  The cell esds are taken
 into account individually in the estimation of esds in distances, angles
 and torsion angles; correlations between esds in cell parameters are only
 used when they are defined by crystal symmetry.  An approximate (isotropic)
 treatment of cell esds is used for estimating esds involving l.s. planes.
;
 
loop_
 _geom_bond_atom_site_label_1
 _geom_bond_atom_site_label_2
 _geom_bond_distance
 _geom_bond_site_symmetry_2
 _geom_bond_publ_flag
C1 C2 1.441(8) . ?
C1 S1 1.794(5) . ?
C2 S2 1.820(6) . ?
C3 C4 1.343(6) . ?
C3 S1 1.744(5) . ?
C3 S3 1.757(4) . ?
C4 S4 1.758(5) . ?
C4 S2 1.756(4) . ?
C5 C6 1.372(6) . ?
C5 S4 1.740(4) . ?
C5 S3 1.744(5) . ?
C6 S6 1.741(5) . ?
C6 S5 1.746(5) . ?
C7 C8 1.347(7) . ?
C7 S7 1.749(5) . ?
C7 S5 1.761(5) . ?
C8 S8 1.748(5) . ?
C8 S6 1.763(5) . ?
C9 C10 1.319(10) . ?
C9 S7 1.769(6) . ?
C10 S8 1.716(8) . ?
C11 C12 1.488(9) . ?
C11 S9 1.816(6) . ?
C12 S10 1.760(6) . ?
C13 C14 1.344(7) . ?
C13 S9 1.747(5) . ?
C13 S11 1.757(5) . ?
C14 S10 1.751(5) . ?
C14 S12 1.756(5) . ?
C15 C16 1.370(7) . ?
C15 S11 1.743(5) . ?
C15 S12 1.750(5) . ?
C16 S14 1.741(5) . ?
C16 S13 1.747(5) . ?
C17 C18 1.350(7) . ?
C17 S13 1.757(5) . ?
C17 S15 1.763(5) . ?
C18 S14 1.751(5) . ?
C18 S16 1.746(5) . ?
C19 C20 1.474(9) . ?
C19 S15 1.798(6) . ?
C20 S16 1.794(5) . ?
C21 C22 1.508(7) . ?
C22 N1 1.519(6) . ?
C23 N1 1.525(6) . ?
C23 C24 1.512(7) . ?
C25 N2 1.160(6) . ?
C25 Fe1 1.947(5) . ?
C26 N3 1.153(7) . ?
C26 Fe1 1.955(5) . ?
C27 N4 1.150(7) . ?
C27 Fe1 1.959(6) . ?
N1 C23 1.525(6) 2_556 ?
N1 C22 1.519(6) 2_556 ?
Fe1 C25 1.947(5) 2_656 ?
Fe1 C26 1.955(5) 2_656 ?
Fe1 C27 1.959(6) 2_656 ?
 
loop_
 _geom_angle_atom_site_label_1
 _geom_angle_atom_site_label_2
 _geom_angle_atom_site_label_3
 _geom_angle
 _geom_angle_site_symmetry_1
 _geom_angle_site_symmetry_3
 _geom_angle_publ_flag
C2 C1 S1 117.2(4) . . ?
C1 C2 S2 117.5(4) . . ?
C4 C3 S1 129.3(4) . . ?
C4 C3 S3 117.1(3) . . ?
S1 C3 S3 113.6(2) . . ?
C3 C4 S4 117.1(3) . . ?
C3 C4 S2 127.8(4) . . ?
S4 C4 S2 115.0(3) . . ?
C6 C5 S4 122.6(4) . . ?
C6 C5 S3 122.0(4) . . ?
S4 C5 S3 115.4(3) . . ?
C5 C6 S6 123.0(4) . . ?
C5 C6 S5 121.6(4) . . ?
S6 C6 S5 115.3(3) . . ?
C8 C7 S7 128.6(4) . . ?
C8 C7 S5 116.3(4) . . ?
S7 C7 S5 115.1(3) . . ?
C7 C8 S8 127.7(4) . . ?
C7 C8 S6 117.7(4) . . ?
S8 C8 S6 114.6(3) . . ?
C10 C9 S7 125.1(5) . . ?
C9 C10 S8 132.6(6) . . ?
C12 C11 S9 117.3(4) . . ?
C11 C12 S10 115.9(5) . . ?
C14 C13 S9 127.3(4) . . ?
C14 C13 S11 117.5(4) . . ?
S9 C13 S11 115.2(3) . . ?
C13 C14 S10 129.6(4) . . ?
C13 C14 S12 116.6(4) . . ?
S10 C14 S12 113.7(3) . . ?
C16 C15 S11 123.7(4) . . ?
C16 C15 S12 121.5(4) . . ?
S11 C15 S12 114.8(3) . . ?
C15 C16 S14 121.8(4) . . ?
C15 C16 S13 123.5(4) . . ?
S14 C16 S13 114.7(3) . . ?
C18 C17 S13 116.9(3) . . ?
C18 C17 S15 127.4(4) . . ?
S13 C17 S15 115.7(3) . . ?
C17 C18 S14 116.9(4) . . ?
C17 C18 S16 128.2(4) . . ?
S14 C18 S16 114.9(3) . . ?
C20 C19 S15 116.5(4) . . ?
C19 C20 S16 113.4(4) . . ?
C21 C22 N1 115.5(4) . . ?
N1 C23 C24 115.8(4) . . ?
N2 C25 Fe1 179.2(5) . . ?
N3 C26 Fe1 177.5(5) . . ?
N4 C27 Fe1 177.7(5) . . ?
C23 N1 C23 111.0(5) 2_556 . ?
C23 N1 C22 111.2(3) 2_556 . ?
C23 N1 C22 106.5(3) . . ?
C23 N1 C22 106.5(3) 2_556 2_556 ?
C23 N1 C22 111.2(3) . 2_556 ?
C22 N1 C22 110.4(5) . 2_556 ?
C3 S1 C1 102.9(2) . . ?
C4 S2 C2 99.7(2) . . ?
C5 S3 C3 95.2(2) . . ?
C5 S4 C4 95.2(2) . . ?
C6 S5 C7 95.6(2) . . ?
C6 S6 C8 95.0(2) . . ?
C7 S7 C9 102.5(3) . . ?
C10 S8 C8 101.0(3) . . ?
C13 S9 C11 101.1(3) . . ?
C14 S10 C12 103.1(3) . . ?
C15 S11 C13 95.2(2) . . ?
C15 S12 C14 95.5(2) . . ?
C17 S13 C16 95.1(2) . . ?
C16 S14 C18 95.5(2) . . ?
C17 S15 C19 101.8(3) . . ?
C18 S16 C20 102.4(3) . . ?
C25 Fe1 C25 90.0(3) . 2_656 ?
C25 Fe1 C26 90.6(2) . . ?
C25 Fe1 C26 91.2(2) 2_656 . ?
C25 Fe1 C26 91.2(2) . 2_656 ?
C25 Fe1 C26 90.6(2) 2_656 2_656 ?
C26 Fe1 C26 177.5(3) . 2_656 ?
C25 Fe1 C27 177.4(2) . . ?
C25 Fe1 C27 88.8(2) 2_656 . ?
C26 Fe1 C27 87.2(2) . . ?
C26 Fe1 C27 91.1(2) 2_656 . ?
C25 Fe1 C27 88.8(2) . 2_656 ?
C25 Fe1 C27 177.4(2) 2_656 2_656 ?
C26 Fe1 C27 91.1(2) . 2_656 ?
C26 Fe1 C27 87.2(2) 2_656 2_656 ?
C27 Fe1 C27 92.5(3) . 2_656 ?
 
_diffrn_measured_fraction_theta_max    0.994
_diffrn_reflns_theta_full              23.54
_diffrn_measured_fraction_theta_full   0.994
_refine_diff_density_max    0.825
_refine_diff_density_min   -0.557
_refine_diff_density_rms    0.132

 data_2-106K
 
_audit_creation_method            SHELXL-97
_chemical_name_systematic
;
 ?
;
_chemical_name_common             ?
_chemical_melting_point           ?
_chemical_formula_moiety          ?
_chemical_formula_sum
 'C54 H56 Fe N7 O2 S32'
_chemical_formula_weight          1916.83
 
loop_
 _atom_type_symbol
 _atom_type_description
 _atom_type_scat_dispersion_real
 _atom_type_scat_dispersion_imag
 _atom_type_scat_source
 'C'  'C'   0.0033   0.0016
 'International Tables Vol C Tables 4.2.6.8 and 6.1.1.4'
 'H'  'H'   0.0000   0.0000
 'International Tables Vol C Tables 4.2.6.8 and 6.1.1.4'
 'N'  'N'   0.0061   0.0033
 'International Tables Vol C Tables 4.2.6.8 and 6.1.1.4'
 'O'  'O'   0.0106   0.0060
 'International Tables Vol C Tables 4.2.6.8 and 6.1.1.4'
 'S'  'S'   0.1246   0.1234
 'International Tables Vol C Tables 4.2.6.8 and 6.1.1.4'
 'Fe'  'Fe'   0.3463   0.8444
 'International Tables Vol C Tables 4.2.6.8 and 6.1.1.4'
 
_symmetry_cell_setting            monoclinic
_symmetry_space_group_name_H-M    P2/n
 
loop_
 _symmetry_equiv_pos_as_xyz
 'x, y, z'
 '-x+1/2, y, -z+1/2'
 '-x, -y, -z'
 'x-1/2, -y, z-1/2'
 
_cell_length_a                    11.0498(6)
_cell_length_b                    8.8371(6)
_cell_length_c                    38.573(3)
_cell_angle_alpha                 90.00
_cell_angle_beta                  90.1420(10)
_cell_angle_gamma                 90.00
_cell_volume                      3766.6(4)
_cell_formula_units_Z             2
_cell_measurement_temperature     106
_cell_measurement_reflns_used     ?
_cell_measurement_theta_min       ?
_cell_measurement_theta_max       ?
 
_exptl_crystal_description        ?
_exptl_crystal_colour             ?
_exptl_crystal_size_max           ?
_exptl_crystal_size_mid           ?
_exptl_crystal_size_min           ?
_exptl_crystal_density_meas       ?
_exptl_crystal_density_diffrn     1.690
_exptl_crystal_density_method     'not measured'
_exptl_crystal_F_000              1966
_exptl_absorpt_coefficient_mu     1.135
_exptl_absorpt_correction_type    ?
_exptl_absorpt_correction_T_min   ?
_exptl_absorpt_correction_T_max   ?
_exptl_absorpt_process_details    ?
 
_exptl_special_details
;
 ?
;
 
_diffrn_ambient_temperature       106
_diffrn_radiation_wavelength      0.71073
_diffrn_radiation_type            MoK\a
_diffrn_radiation_source          'fine-focus sealed tube'
_diffrn_radiation_monochromator   graphite
_diffrn_measurement_device_type   ?
_diffrn_measurement_method        ?
_diffrn_detector_area_resol_mean  ?
_diffrn_standards_number          ?
_diffrn_standards_interval_count  ?
_diffrn_standards_interval_time   ?
_diffrn_standards_decay_%         ?
_diffrn_reflns_number             4950
_diffrn_reflns_av_R_equivalents   0.0233
_diffrn_reflns_av_sigmaI/netI     0.0600
_diffrn_reflns_limit_h_min        -13
_diffrn_reflns_limit_h_max        13
_diffrn_reflns_limit_k_min        -10
_diffrn_reflns_limit_k_max        7
_diffrn_reflns_limit_l_min        -46
_diffrn_reflns_limit_l_max        45
_diffrn_reflns_theta_min          2.80
_diffrn_reflns_theta_max          25.34
_reflns_number_total              4441
_reflns_number_gt                 3291
_reflns_threshold_expression      >2sigma(I)
 
_computing_data_collection        'Collect  (Nonius BV, 1997-2000)'
_computing_cell_refinement        'HKL Scalepack (Otwinowski & Minor 1997)'
_computing_data_reduction   'HKL Denzo and Scalepack (Otwinowski & Minor 1997)'
_computing_structure_solution     'SHELXS-97 (Sheldrick, 1997)'
_computing_structure_refinement   'SHELXL-97 (Sheldrick, 1997)'
_computing_molecular_graphics     ?
_computing_publication_material   ?
 
_refine_special_details
;
 Refinement of F^2^ against ALL reflections.  The weighted R-factor wR and
 goodness of fit S are based on F^2^, conventional R-factors R are based
 on F, with F set to zero for negative F^2^. The threshold expression of
 F^2^ > 2sigma(F^2^) is used only for calculating R-factors(gt) etc. and is
 not relevant to the choice of reflections for refinement.  R-factors based
 on F^2^ are statistically about twice as large as those based on F, and R-
 factors based on ALL data will be even larger.
;
 
_refine_ls_structure_factor_coef  Fsqd
_refine_ls_matrix_type            full
_refine_ls_weighting_scheme       calc
_refine_ls_weighting_details
 'calc w=1/[\s^2^(Fo^2^)+(0.1088P)^2^+3.4394P] where P=(Fo^2^+2Fc^2^)/3'
_atom_sites_solution_primary      direct
_atom_sites_solution_secondary    difmap
_atom_sites_solution_hydrogens    geom
_refine_ls_hydrogen_treatment     mixed
_refine_ls_extinction_method      none
_refine_ls_extinction_coef        ?
_refine_ls_number_reflns          4441
_refine_ls_number_parameters      414
_refine_ls_number_restraints      0
_refine_ls_R_factor_all           0.1094
_refine_ls_R_factor_gt            0.0778
_refine_ls_wR_factor_ref          0.2281
_refine_ls_wR_factor_gt           0.2076
_refine_ls_goodness_of_fit_ref    1.382
_refine_ls_restrained_S_all       1.382
_refine_ls_shift/su_max           0.034
_refine_ls_shift/su_mean          0.002
 
loop_
 _atom_site_label
 _atom_site_type_symbol
 _atom_site_fract_x
 _atom_site_fract_y
 _atom_site_fract_z
 _atom_site_U_iso_or_equiv
 _atom_site_adp_type
 _atom_site_occupancy
 _atom_site_symmetry_multiplicity
 _atom_site_calc_flag
 _atom_site_refinement_flags
 _atom_site_disorder_assembly
 _atom_site_disorder_group
C1 C 0.5692(11) 0.4489(12) 1.1421(3) 0.049(3) Uani 1 1 d . . .
H1A H 0.5719 0.5484 1.1527 0.058 Uiso 1 1 calc R . .
H1B H 0.5226 0.3841 1.1574 0.058 Uiso 1 1 calc R . .
C2 C 0.6879(11) 0.3925(15) 1.1409(4) 0.064(4) Uani 1 1 d . . .
H2A H 0.7209 0.3975 1.1642 0.077 Uiso 1 1 calc R . .
H2B H 0.7350 0.4612 1.1267 0.077 Uiso 1 1 calc R . .
C3 C 0.5568(8) 0.3266(9) 1.0765(3) 0.025(2) Uani 1 1 d . . .
C4 C 0.6450(8) 0.2251(10) 1.0854(3) 0.031(3) Uani 1 1 d . . .
C5 C 0.6000(7) 0.1796(10) 1.0207(3) 0.027(2) Uani 1 1 d . . .
C6 C 0.6033(7) 0.1264(9) 0.9865(3) 0.023(2) Uani 1 1 d . . .
C7 C 0.5731(7) 0.0962(9) 0.9220(3) 0.022(2) Uani 1 1 d . . .
C8 C 0.6628(7) -0.0018(10) 0.9306(3) 0.025(2) Uani 1 1 d . . .
C9 C 0.6351(10) 0.0494(11) 0.8552(3) 0.042(3) Uani 1 1 d . . .
H9A H 0.6125 0.0522 0.8309 0.051 Uiso 1 1 calc R . .
H9B H 0.7050 0.1146 0.8582 0.051 Uiso 1 1 calc R . .
C10 C 0.6703(9) -0.1089(10) 0.8645(3) 0.033(3) Uani 1 1 d . . .
H10A H 0.7228 -0.1481 0.8465 0.040 Uiso 1 1 calc R . .
H10B H 0.5979 -0.1710 0.8648 0.040 Uiso 1 1 calc R . .
C11 C 0.8749(14) 0.7661(16) 1.1140(4) 0.088(6) Uani 1 1 d . . .
H11A H 0.8364 0.8238 1.1324 0.106 Uiso 1 1 calc R . .
H11B H 0.8996 0.6707 1.1243 0.106 Uiso 1 1 calc R . .
C12 C 0.9793(11) 0.8420(17) 1.1057(3) 0.069(4) Uani 1 1 d . . .
H12A H 1.0449 0.7693 1.1071 0.083 Uiso 1 1 calc R . .
H12B H 0.9934 0.9157 1.1239 0.083 Uiso 1 1 calc R . .
C13 C 0.8391(8) 0.7166(10) 1.0443(3) 0.023(2) Uani 1 1 d . . .
C14 C 0.9366(8) 0.8042(10) 1.0374(3) 0.025(2) Uani 1 1 d . . .
C15 C 0.9061(7) 0.6381(9) 0.9836(3) 0.021(2) Uani 1 1 d . . .
C16 C 0.9096(7) 0.5911(9) 0.9503(3) 0.022(2) Uani 1 1 d . . .
C17 C 0.8375(8) 0.5218(9) 0.8884(3) 0.021(2) Uani 1 1 d . . .
C18 C 0.9370(8) 0.6039(9) 0.8836(3) 0.022(2) Uani 1 1 d . . .
C19 C 0.8563(8) 0.4430(10) 0.8207(3) 0.033(3) Uani 1 1 d . . .
H19A H 0.9236 0.3783 0.8271 0.039 Uiso 1 1 calc R . .
H19B H 0.8188 0.4000 0.8001 0.039 Uiso 1 1 calc R . .
C20 C 0.9050(8) 0.6006(10) 0.8118(3) 0.029(2) Uani 1 1 d . . .
H20A H 0.8372 0.6674 0.8072 0.035 Uiso 1 1 calc R . .
H20B H 0.9529 0.5941 0.7909 0.035 Uiso 1 1 calc R . .
C21 C 0.1651(19) -0.130(2) 0.7831(6) 0.148(8) Uiso 1 1 d . . .
H21A H 0.0940 -0.1920 0.7854 0.222 Uiso 1 1 calc R . .
H21B H 0.1776 -0.0739 0.8041 0.222 Uiso 1 1 calc R . .
H21C H 0.2340 -0.1941 0.7789 0.222 Uiso 1 1 calc R . .
C22 C 0.143(3) 0.015(3) 0.7427(9) 0.221(13) Uiso 1 1 d . . .
H22A H 0.1441 -0.0351 0.7203 0.266 Uiso 1 1 calc R . .
H22B H 0.0722 0.0785 0.7449 0.266 Uiso 1 1 calc R . .
C23 C 0.225(3) 0.193(3) 0.7092(8) 0.236(14) Uiso 1 1 d . . .
H23A H 0.2350 0.1292 0.6890 0.283 Uiso 1 1 calc R . .
H23B H 0.1471 0.2435 0.7084 0.283 Uiso 1 1 calc R . .
C24 C 0.3260(16) 0.298(2) 0.7144(5) 0.118(6) Uiso 1 1 d . . .
H24A H 0.3261 0.3716 0.6961 0.176 Uiso 1 1 calc R . .
H24B H 0.4008 0.2428 0.7141 0.176 Uiso 1 1 calc R . .
H24C H 0.3172 0.3482 0.7363 0.176 Uiso 1 1 calc R . .
C25 C 0.6493(8) -0.0995(11) 0.7714(3) 0.027(2) Uani 1 1 d . . .
C26 C 0.8523(8) 0.0564(10) 0.7911(3) 0.025(2) Uani 1 1 d . . .
C27 C 0.8515(7) 0.2109(10) 0.7291(3) 0.028(3) Uani 1 1 d . . .
N1 N 0.2500 0.0905(13) 0.7500 0.036(3) Uani 1 2 d S . .
N2 N 0.5884(7) -0.1888(9) 0.7836(2) 0.035(2) Uani 1 1 d . . .
N3 N 0.9131(7) 0.0613(9) 0.8151(3) 0.034(2) Uani 1 1 d . . .
N4 N 0.9126(6) 0.2985(9) 0.7174(3) 0.036(2) Uani 1 1 d . . .
O1 O 0.0609(6) 0.5595(7) 0.7259(2) 0.042(2) Uani 1 1 d . . .
S1 S 0.4896(2) 0.4647(3) 1.10204(8) 0.0332(7) Uani 1 1 d . . .
S2 S 0.7142(3) 0.2030(3) 1.12480(9) 0.0478(9) Uani 1 1 d . . .
S3 S 0.5050(2) 0.3235(3) 1.03400(7) 0.0252(6) Uani 1 1 d . . .
S4 S 0.6962(2) 0.1079(3) 1.05200(8) 0.0303(7) Uani 1 1 d . . .
S5 S 0.5111(2) 0.2011(3) 0.95522(7) 0.0264(6) Uani 1 1 d . . .
S6 S 0.7052(2) -0.0085(3) 0.97366(8) 0.0310(7) Uani 1 1 d . . .
S7 S 0.5115(2) 0.1244(3) 0.88054(7) 0.0289(6) Uani 1 1 d . . .
S8 S 0.7447(2) -0.1276(3) 0.90462(8) 0.0400(8) Uani 1 1 d . . .
S9 S 0.7594(2) 0.7226(3) 1.08324(7) 0.0340(7) Uani 1 1 d . . .
S10 S 0.9950(2) 0.9399(3) 1.06524(8) 0.0341(7) Uani 1 1 d . . .
S11 S 0.80330(19) 0.5739(2) 1.01449(7) 0.0240(6) Uani 1 1 d . . .
S12 S 1.0174(2) 0.7626(3) 0.99948(7) 0.0257(6) Uani 1 1 d . . .
S13 S 0.8047(2) 0.4639(3) 0.93115(7) 0.0276(6) Uani 1 1 d . . .
S14 S 1.02301(19) 0.6473(3) 0.92106(7) 0.0249(6) Uani 1 1 d . . .
S15 S 0.7479(2) 0.4439(3) 0.85524(7) 0.0292(6) Uani 1 1 d . . .
S16 S 0.9965(2) 0.6822(3) 0.84583(8) 0.0425(8) Uani 1 1 d . . .
Fe1 Fe 0.7500 0.0548(2) 0.7500 0.0213(5) Uani 1 2 d S . .
 
loop_
 _atom_site_aniso_label
 _atom_site_aniso_U_11
 _atom_site_aniso_U_22
 _atom_site_aniso_U_33
 _atom_site_aniso_U_23
 _atom_site_aniso_U_13
 _atom_site_aniso_U_12
C1 0.077(9) 0.046(7) 0.023(8) 0.012(5) -0.022(7) -0.006(6)
C2 0.063(8) 0.089(10) 0.041(10) -0.009(7) -0.014(7) -0.001(7)
C3 0.027(5) 0.024(5) 0.025(7) 0.007(4) -0.006(5) -0.005(4)
C4 0.026(5) 0.036(6) 0.032(7) -0.002(5) -0.005(5) -0.005(4)
C5 0.015(5) 0.028(5) 0.036(7) 0.001(5) 0.005(5) 0.002(4)
C6 0.017(5) 0.023(5) 0.030(7) -0.001(5) 0.000(5) 0.002(4)
C7 0.017(4) 0.024(5) 0.027(7) -0.007(4) 0.009(4) 0.001(4)
C8 0.013(4) 0.035(5) 0.028(7) -0.009(5) 0.005(4) -0.004(4)
C9 0.061(7) 0.035(6) 0.031(8) -0.003(5) 0.027(6) 0.008(5)
C10 0.051(6) 0.023(5) 0.026(7) -0.006(5) 0.001(5) 0.009(4)
C11 0.138(13) 0.083(10) 0.044(11) 0.014(8) -0.043(10) -0.073(10)
C12 0.060(8) 0.136(13) 0.011(8) -0.007(8) 0.005(6) -0.029(8)
C13 0.030(5) 0.028(5) 0.012(6) 0.008(4) 0.001(4) -0.004(4)
C14 0.027(5) 0.030(5) 0.017(6) 0.000(4) -0.003(4) -0.001(4)
C15 0.017(5) 0.021(5) 0.026(6) 0.006(4) 0.001(4) -0.001(4)
C16 0.016(4) 0.027(5) 0.022(7) 0.003(4) 0.002(4) 0.003(4)
C17 0.023(5) 0.025(5) 0.015(6) -0.003(4) 0.001(4) 0.004(4)
C18 0.026(5) 0.026(5) 0.015(6) -0.003(4) 0.000(4) 0.005(4)
C19 0.033(5) 0.037(6) 0.028(7) -0.014(5) 0.002(5) 0.007(4)
C20 0.028(5) 0.046(6) 0.012(6) -0.001(5) -0.007(5) 0.004(4)
C25 0.021(5) 0.032(6) 0.028(7) -0.002(5) -0.001(5) 0.001(4)
C26 0.021(5) 0.026(5) 0.028(7) -0.004(5) -0.002(5) 0.008(4)
C27 0.010(4) 0.033(6) 0.040(8) -0.014(5) -0.009(5) -0.003(4)
N1 0.010(5) 0.059(8) 0.037(9) 0.000 -0.004(6) 0.000
N2 0.039(5) 0.034(5) 0.032(6) 0.003(4) 0.007(5) 0.000(4)
N3 0.027(4) 0.039(5) 0.034(7) -0.005(4) -0.006(4) 0.008(4)
N4 0.019(4) 0.040(5) 0.049(7) 0.007(5) 0.004(4) -0.004(4)
O1 0.042(4) 0.041(4) 0.044(6) 0.006(4) -0.014(4) -0.003(3)
S1 0.0293(13) 0.0461(16) 0.0243(18) -0.0119(13) 0.0013(13) -0.0023(11)
S2 0.0623(19) 0.0373(16) 0.044(2) 0.0057(14) -0.0296(17) -0.0098(13)
S3 0.0237(12) 0.0291(13) 0.0229(16) -0.0018(11) 0.0003(11) 0.0039(9)
S4 0.0232(12) 0.0336(14) 0.0342(19) -0.0001(12) -0.0048(12) 0.0042(10)
S5 0.0259(12) 0.0302(13) 0.0231(16) -0.0035(11) 0.0053(12) 0.0050(10)
S6 0.0217(12) 0.0334(14) 0.038(2) -0.0078(12) -0.0002(13) 0.0086(10)
S7 0.0304(13) 0.0346(14) 0.0218(17) -0.0024(12) 0.0071(12) 0.0015(10)
S8 0.0258(13) 0.0504(17) 0.044(2) -0.0255(15) -0.0026(14) 0.0147(11)
S9 0.0322(14) 0.0475(16) 0.0223(18) 0.0049(13) 0.0070(12) 0.0106(11)
S10 0.0390(14) 0.0317(14) 0.0316(19) -0.0040(13) -0.0083(13) -0.0017(11)
S11 0.0213(11) 0.0303(13) 0.0203(16) -0.0018(11) 0.0039(11) -0.0050(9)
S12 0.0267(12) 0.0331(13) 0.0174(16) -0.0017(11) 0.0034(11) -0.0095(10)
S13 0.0293(13) 0.0339(14) 0.0196(16) -0.0012(11) 0.0013(12) -0.0081(10)
S14 0.0199(12) 0.0349(14) 0.0200(16) 0.0014(11) 0.0008(11) -0.0012(9)
S15 0.0277(13) 0.0393(15) 0.0206(17) -0.0074(12) 0.0030(12) -0.0049(10)
S16 0.0331(15) 0.073(2) 0.0217(18) 0.0071(14) -0.0022(13) -0.0165(13)
Fe1 0.0159(9) 0.0277(10) 0.0202(13) 0.000 0.0007(9) 0.000
 
_geom_special_details
;
 All esds (except the esd in the dihedral angle between two l.s. planes)
 are estimated using the full covariance matrix.  The cell esds are taken
 into account individually in the estimation of esds in distances, angles
 and torsion angles; correlations between esds in cell parameters are only
 used when they are defined by crystal symmetry.  An approximate (isotropic)
 treatment of cell esds is used for estimating esds involving l.s. planes.
;
 
loop_
 _geom_bond_atom_site_label_1
 _geom_bond_atom_site_label_2
 _geom_bond_distance
 _geom_bond_site_symmetry_2
 _geom_bond_publ_flag
C1 C2 1.404(15) . ?
C1 S1 1.783(11) . ?
C2 S2 1.809(13) . ?
C3 C4 1.368(12) . ?
C3 S1 1.737(10) . ?
C3 S3 1.734(10) . ?
C4 S4 1.747(11) . ?
C4 S2 1.712(11) . ?
C5 C6 1.403(14) . ?
C5 S3 1.727(9) . ?
C5 S4 1.727(10) . ?
C6 S6 1.714(9) . ?
C6 S5 1.708(10) . ?
C7 C8 1.357(12) . ?
C7 S5 1.726(9) . ?
C7 S7 1.754(11) . ?
C8 S8 1.751(9) . ?
C8 S6 1.724(11) . ?
C9 C10 1.495(13) . ?
C9 S7 1.807(10) . ?
C10 S8 1.759(10) . ?
C11 C12 1.374(16) . ?
C11 S9 1.784(12) . ?
C12 S10 1.794(14) . ?
C13 C14 1.353(12) . ?
C13 S9 1.743(10) . ?
C13 S11 1.752(10) . ?
C14 S12 1.756(10) . ?
C14 S10 1.733(9) . ?
C15 C16 1.350(13) . ?
C15 S11 1.743(10) . ?
C15 S12 1.759(9) . ?
C16 S14 1.760(9) . ?
C16 S13 1.774(9) . ?
C17 C18 1.331(11) . ?
C17 S13 1.765(10) . ?
C17 S15 1.756(10) . ?
C18 S16 1.743(10) . ?
C18 S14 1.769(10) . ?
C19 C20 1.532(13) . ?
C19 S15 1.795(10) . ?
C20 S16 1.804(10) . ?
C21 C22 2.03(3) . ?
C22 N1 1.38(3) . ?
C23 C24 1.47(3) . ?
C23 N1 1.83(3) . ?
C25 N2 1.140(11) . ?
C25 Fe1 1.945(10) . ?
C26 N3 1.145(12) . ?
C26 Fe1 1.944(11) . ?
C27 N4 1.123(11) . ?
C27 Fe1 1.953(10) . ?
N1 C22 1.38(3) 2_556 ?
N1 C23 1.83(3) 2_556 ?
Fe1 C27 1.953(10) 2_656 ?
Fe1 C25 1.945(10) 2_656 ?
Fe1 C26 1.944(11) 2_656 ?
 
loop_
 _geom_angle_atom_site_label_1
 _geom_angle_atom_site_label_2
 _geom_angle_atom_site_label_3
 _geom_angle
 _geom_angle_site_symmetry_1
 _geom_angle_site_symmetry_3
 _geom_angle_publ_flag
C2 C1 S1 117.2(10) . . ?
C1 C2 S2 119.5(9) . . ?
C4 C3 S1 128.5(8) . . ?
C4 C3 S3 117.4(8) . . ?
S1 C3 S3 114.0(5) . . ?
C3 C4 S4 115.8(8) . . ?
C3 C4 S2 127.9(9) . . ?
S4 C4 S2 116.2(5) . . ?
C6 C5 S3 122.9(7) . . ?
C6 C5 S4 121.2(7) . . ?
S3 C5 S4 115.9(6) . . ?
C5 C6 S6 121.5(7) . . ?
C5 C6 S5 121.2(7) . . ?
S6 C6 S5 117.2(6) . . ?
C8 C7 S5 116.8(8) . . ?
C8 C7 S7 126.6(8) . . ?
S5 C7 S7 116.5(5) . . ?
C7 C8 S8 130.0(9) . . ?
C7 C8 S6 117.1(8) . . ?
S8 C8 S6 113.0(5) . . ?
C10 C9 S7 114.2(8) . . ?
C9 C10 S8 114.8(7) . . ?
C12 C11 S9 123.4(11) . . ?
C11 C12 S10 121.5(10) . . ?
C14 C13 S9 123.8(8) . . ?
C14 C13 S11 117.5(7) . . ?
S9 C13 S11 118.3(5) . . ?
C13 C14 S12 116.8(7) . . ?
C13 C14 S10 124.8(8) . . ?
S12 C14 S10 118.1(5) . . ?
C16 C15 S11 124.8(7) . . ?
C16 C15 S12 120.1(7) . . ?
S11 C15 S12 114.9(6) . . ?
C15 C16 S14 123.0(7) . . ?
C15 C16 S13 124.8(7) . . ?
S14 C16 S13 112.2(6) . . ?
C18 C17 S13 117.4(7) . . ?
C18 C17 S15 125.2(8) . . ?
S13 C17 S15 116.8(5) . . ?
C17 C18 S16 130.3(8) . . ?
C17 C18 S14 116.5(8) . . ?
S16 C18 S14 113.2(5) . . ?
C20 C19 S15 113.3(7) . . ?
C19 C20 S16 113.5(7) . . ?
N1 C22 C21 92.8(17) . . ?
C24 C23 N1 94.8(19) . . ?
N2 C25 Fe1 178.7(9) . . ?
N3 C26 Fe1 178.2(9) . . ?
N4 C27 Fe1 178.1(9) . . ?
C22 N1 C22 122(3) . 2_556 ?
C22 N1 C23 86.3(14) . . ?
C22 N1 C23 122.7(16) 2_556 . ?
C22 N1 C23 122.7(16) . 2_556 ?
C22 N1 C23 86.3(14) 2_556 2_556 ?
C23 N1 C23 121(2) . 2_556 ?
C3 S1 C1 103.1(5) . . ?
C2 S2 C4 97.3(5) . . ?
C5 S3 C3 95.3(5) . . ?
C4 S4 C5 95.6(5) . . ?
C7 S5 C6 94.5(5) . . ?
C6 S6 C8 94.4(5) . . ?
C9 S7 C7 98.5(5) . . ?
C8 S8 C10 101.8(5) . . ?
C13 S9 C11 102.6(6) . . ?
C12 S10 C14 99.7(6) . . ?
C15 S11 C13 93.9(4) . . ?
C15 S12 C14 93.7(4) . . ?
C16 S13 C17 94.0(4) . . ?
C16 S14 C18 94.6(4) . . ?
C17 S15 C19 99.6(5) . . ?
C18 S16 C20 103.7(5) . . ?
C27 Fe1 C27 90.1(5) 2_656 . ?
C27 Fe1 C25 89.5(4) 2_656 . ?
C27 Fe1 C25 179.2(4) . . ?
C27 Fe1 C25 179.2(4) 2_656 2_656 ?
C27 Fe1 C25 89.5(4) . 2_656 ?
C25 Fe1 C25 91.0(6) . 2_656 ?
C27 Fe1 C26 89.5(4) 2_656 . ?
C27 Fe1 C26 89.9(4) . . ?
C25 Fe1 C26 89.5(4) . . ?
C25 Fe1 C26 91.1(4) 2_656 . ?
C27 Fe1 C26 89.9(4) 2_656 2_656 ?
C27 Fe1 C26 89.5(4) . 2_656 ?
C25 Fe1 C26 91.1(4) . 2_656 ?
C25 Fe1 C26 89.5(4) 2_656 2_656 ?
C26 Fe1 C26 179.2(5) . 2_656 ?
 
_diffrn_measured_fraction_theta_max    0.644
_diffrn_reflns_theta_full              25.34
_diffrn_measured_fraction_theta_full   0.644
_refine_diff_density_max    2.473
_refine_diff_density_min   -0.908
_refine_diff_density_rms    0.140

 
